# Supplementary material for: Palladium–copper catalyzed C(sp3)–C(sp2) bond C–H activation cross-coupling reaction: selective arylation to synthesize 9-aryl-9H-xanthene and 9,9-diaryl-xanthene derivatives
Source: Royal Society of Chemistry journal article supplement (doi:10.1039/c6ra17546e), 2016-01-01
Supplement: c6ra17546e1.pdf [file c6ra17546e1.pdf]

**Palladium-Copper Catalyzed C(sp<sup>3</sup>)-C(sp<sup>2</sup>) Bond C-H Activation  
Cross-Coupling Reaction: Selective Arylation to Synthesis 9-Aryl-  
9*H*-Xanthene and 9,9-Diaryl-Xanthene Derivatives**

Guodong Shen,\* Lingyu Zhao, Yichen Wang, Wenfang Xia, Mingsen Yang, Tongxin  
Zhang\*

School of Chemistry and Chemical Engineering, School of Pharmacy, Liaocheng  
University, Liaocheng 252000, Shandong, PR China  
Tel & Fax: (+86)-635-8239680; e-mail: shenguodong33@163.com

**Contents**

|                                                                                                              |     |
|--------------------------------------------------------------------------------------------------------------|-----|
| 1. General information.....                                                                                  | S2  |
| 2. General procedure for the synthesis of 9-phenyl-9 <i>H</i> -xanthenes and 9,9-<br>diphenyl-xanthenes..... | S2  |
| 3. The crystal structure of 1d.....                                                                          | S3  |
| 4. Date of the products.....                                                                                 | S3  |
| 5. Copies of NMR spectra.....                                                                                | S14 |
| 6. References.....                                                                                           | S42 |

## 1. General Information

All reagents and solvents were pure analytical grade materials purchased from commercial sources and were used without further purification, if not stated otherwise. All melting points are uncorrected. All starting substrates were prepared according to the known literatures. The NMR spectra were recorded in CDCl<sub>3</sub> or DMSO-d<sub>6</sub> on a 400 MHz instrument with TMS as internal standard. High-resolution mass spectra (HRMS) were obtained with a Q-TOF Premier (ESI). TLC was carried out with 0.2 mm thick silica gel plates (GF254). Visualization was accomplished by UV light. Column chromatography was hand packed with silica gel (200-300 mesh). All reactions were carried out in an oven-dried Schlenk tube equipped with a magnetic stir bar.

## 2. General procedure for the synthesis of 9-phenyl-9*H*-xanthenes and 9,9-diphenyl-xanthenes

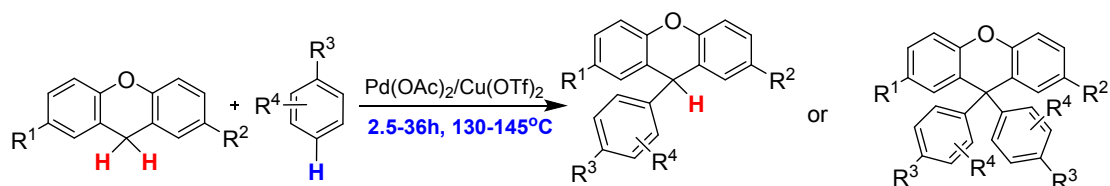

An oven-dried Schlenk tube equipped with a Teflon valve was charged with a magnetic stir bar, palladium acetate (0.025 mmol), copper(II) trifluoromethanesulfonate (0.05 mmol), xanthenes **a** (0.5 mmol) and aromatics **b** 1.5 mL (If **b** was solid, 0.5 g **b** was added directly). Then the reaction system was sealed and stirred at 130-150 °C for 2.5-36 h. The reaction was monitored by TLC. When the starting material **a** was consumed completely, the resulting suspension was cooled to room temperature and filtered through a pad of filter paper with 20 mL of ethyl acetate for 3 times. After evaporating the solvent under reduced pressure, the residue was purified by column chromatography on silica gel to give the pure product.

### 3. The crystal structure of 1d

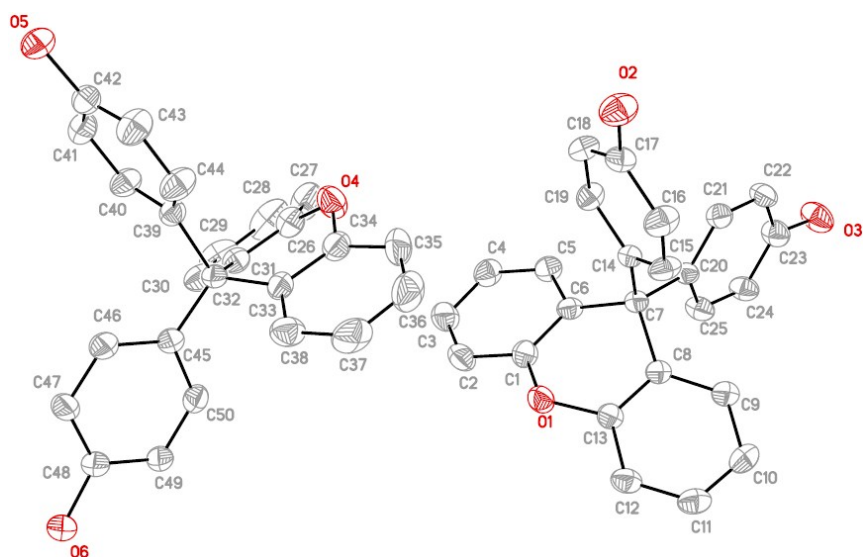

### 4. General Data

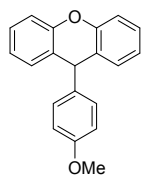

9-(4-methoxyphenyl)-9*H*-xanthene (**1c**).<sup>1</sup> Mp: 110-113 °C. Compound **1c** was purified by flash column chromatography (PE/EtOAc = 30:1) as a white solid (122mg, 85% yield). IR (neat):  $\nu_{\max}$  3030, 2833, 1611, 1509, 1483, 1317, 1258, 1209, 1028, 904, 812, 786, 613. <sup>1</sup>H NMR (400M Hz, CDCl<sub>3</sub>/TMS):  $\delta$  7.20 (t,  $J$  = 8.0 Hz, 2H),  $\delta$  7.12-7.10 (m, 4H),  $\delta$  7.05 (d,  $J$  = 8.0 Hz, 2H),  $\delta$  6.97 (t,  $J$  = 8.0 Hz, 2H),  $\delta$  6.81 (d,  $J$  = 8.0 Hz, 2H),  $\delta$  5.21 (s, 1H),  $\delta$  3.75 (s, 3H). <sup>13</sup>C NMR (100M Hz, CDCl<sub>3</sub>/TMS): 158.40, 151.15, 138.95, 129.79, 129.51, 127.90, 124.86, 123.30, 116.62, 114.22, 55.32, 43.64. HRMS (ESI):  $m/z$  calcd for C<sub>20</sub>H<sub>17</sub>O<sub>2</sub> [M+H]<sup>+</sup>: 289.1229, found: 289.1221.

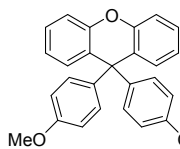

9,9-bis(4-methoxyphenyl)-9*H*-xanthene (**1d**). Mp: 148-149 °C. Compound **1d** was purified by flash column chromatography (PE/EtOAc = 30:1) as a white solid (158mg, 80% yield). IR (neat):  $\nu_{\max}$  3032, 2959, 2834, 1607, 1509, 1474, 1442, 1279, 1251, 1230, 1037, 870, 806, 793, 783, 767, 585. <sup>1</sup>H NMR (400M Hz, CDCl<sub>3</sub>/TMS):  $\delta$  7.20 (t,  $J$  = 8.0 Hz, 2H),  $\delta$  7.17 (d,  $J$  = 8.0 Hz, 2H),  $\delta$  7.06 (t,  $J$  = 8.0

Hz, 2H),  $\delta$  6.97 (d,  $J = 8.0$  Hz, 2H),  $\delta$  6.91 (d,  $J = 8.0$  Hz, 4H),  $\delta$  6.79 (d,  $J = 8.0$  Hz, 4H),  $\delta$  3.78 (s, 6H).  $^{13}\text{C}$  NMR (100M Hz,  $\text{CDCl}_3/\text{TMS}$ ): 158.10, 152.56, 138.23, 131.11, 130.91, 130.10, 127.83, 122.89, 116.50, 113.24, 55.29, 53.18. HRMS (ESI):  $m/z$  calcd for  $\text{C}_{27}\text{H}_{13}\text{O}_3$   $[\text{M}+\text{H}]^+$ : 395.1647, found: 395.1650.

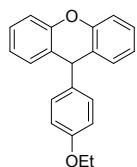

9-(4-ethoxyphenyl)-9H-xanthene (**2c**). Mp: 70-72 °C. Compound **2c** was purified by flash column chromatography (PE/EtOAc = 30:1) as a white solid (113 mg, 75% yield). IR (neat):  $\nu_{\text{max}}$  3010, 2964, 2830, 1609, 1508, 1479, 1448, 1255, 1178, 1118, 1047, 752, 618, 588.  $^1\text{H}$  NMR (400M Hz,  $\text{CDCl}_3/\text{TMS}$ ):  $\delta$  7.21 (dt,  $J_1 = 0.6$  Hz,  $J_2 = 8.0$  Hz, 2H),  $\delta$  7.14- 7.09 (m, 4H),  $\delta$  7.06 (d,  $J = 8.0$  Hz, 2H),  $\delta$  6.98 (dt,  $J_1 = 0.6$  Hz,  $J_2 = 8.0$  Hz, 2H),  $\delta$  6.81 (d,  $J = 8.0$  Hz, 2H),  $\delta$  5.21 (s, 1H),  $\delta$  3.98 (q,  $J = 6.8$  Hz, 2H),  $\delta$  1.39 (t,  $J = 6.8$  Hz, 3H).  $^{13}\text{C}$  NMR (100M Hz,  $\text{CDCl}_3/\text{TMS}$ ): 157.80, 151.16, 138.77, 129.82, 129.51, 127.87, 124.90, 123.29, 116.61, 114.75, 63.49, 43.60, 14.90. HRMS (ESI):  $m/z$  calcd for  $\text{C}_{21}\text{H}_{19}\text{O}_2$   $[\text{M}+\text{H}]^+$ : 303.1385, found: 303.1380.

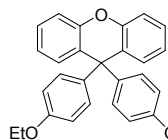

9,9-bis(4-ethoxyphenyl)-9H-xanthene (**2d**). Mp: 110-111 °C. Compound **2d** was purified by flash column chromatography (PE/EtOAc = 30:1) as a white solid (139 mg, 66% yield). IR (neat):  $\nu_{\text{max}}$  3033, 2979, 2835, 1608, 1508, 1476, 1443, 1390, 1300, 1250, 1177, 1049, 872, 765.  $^1\text{H}$  NMR (400M Hz,  $\text{CDCl}_3/\text{TMS}$ ):  $\delta$  7.23 (dt,  $J_1 = 1.6$  Hz,  $J_2 = 8.0$  Hz, 2H),  $\delta$  7.13 (dd,  $J_1 = 1.6$  Hz,  $J_2 = 8.0$  Hz, 2H),  $\delta$  7.02 (dt,  $J_1 = 0.6$  Hz,  $J_2 = 8.0$  Hz, 2H),  $\delta$  6.93 (dd,  $J_1 = 0.6$  Hz,  $J_2 = 8.0$  Hz, 2H),  $\delta$  6.86 (d,  $J = 8.0$  Hz, 4H),  $\delta$  6.74 (d,  $J = 8.0$  Hz, 4H),  $\delta$  3.97 (q,  $J = 7.2$  Hz, 4H),  $\delta$  1.37 (t,  $J = 7.2$  Hz, 6H).  $^{13}\text{C}$  NMR (100M Hz,  $\text{CDCl}_3/\text{TMS}$ ): 157.48, 152.59, 138.10, 131.11, 130.98, 130.16, 127.80, 122.87, 116.49, 113.74, 63.45, 53.20, 15.00. HRMS (ESI):  $m/z$  calcd for  $\text{C}_{29}\text{H}_{17}\text{O}_3$   $[\text{M}+\text{H}]^+$ : 423.1960, found: 423.1956.

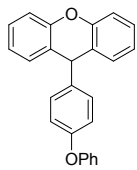

9-(4-phenoxyphenyl)-9H-xanthene (**3c**). Mp: 100-101 °C. Compound **3c** was purified by flash column chromatography (PE/EtOAc = 30:1) as a white solid (105 mg, 60% yield). IR (neat):  $\nu_{\max}$  3030, 2963, 1588, 1477, 1454, 1260, 1097, 1023, 802, 750, 690.  $^1\text{H}$  NMR (400M Hz,  $\text{CDCl}_3/\text{TMS}$ ):  $\delta$  7.31 (t,  $J = 8.0$  Hz, 2H),  $\delta$  7.22 (t,  $J = 8.0$  Hz, 2H),  $\delta$  7.16-7.13 (m, 4H),  $\delta$  7.10-7.07 (m, 3H),  $\delta$  7.03-6.98 (m, 4H),  $\delta$  6.90 (d,  $J = 8.0$  Hz, 2H),  $\delta$  5.25 (s, 1H).  $^{13}\text{C}$  NMR (100M Hz,  $\text{CDCl}_3/\text{TMS}$ ): 157.15, 156.10, 151.19, 141.47, 129.83, 129.80, 129.69, 128.04, 124.61, 123.41, 123.38, 119.12, 119.02, 116.73, 43.86. HRMS (ESI):  $m/z$  calcd for  $\text{C}_{25}\text{H}_{19}\text{O}_2$   $[\text{M}+\text{H}]^+$ : 351.1385, found: 351.1388.

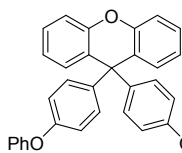

9,9-bis(4-phenoxyphenyl)-9H-xanthene (**3d**). Mp: 154-157 °C. Compound **3d** was purified by flash column chromatography (PE/EtOAc = 30:1) as a white solid (145 mg, 55% yield). IR (neat):  $\nu_{\max}$  3031, 1588, 1488, 1442, 1241, 1170, 1013, 872, 753, 691, 625, 591, 578.  $^1\text{H}$  NMR (400M Hz,  $\text{CDCl}_3/\text{TMS}$ ):  $\delta$  7.33-7.24 (m, 6H),  $\delta$  7.06 (d,  $J = 8.0$  Hz, 2H),  $\delta$  7.10-7.01 (m, 8H),  $\delta$  6.97-6.92 (m, 6H),  $\delta$  6.86 (d,  $J = 8.0$  Hz, 4H).  $^{13}\text{C}$  NMR (100M Hz,  $\text{CDCl}_3/\text{TMS}$ ): 156.85, 156.05, 152.54, 140.50, 131.39, 130.44, 130.12, 129.87, 128.08, 123.61, 123.05, 119.36, 117.82, 116.63, 53.44. HRMS (ESI):  $m/z$  calcd for  $\text{C}_{37}\text{H}_{27}\text{O}_3$   $[\text{M}+\text{H}]^+$ : 519.1960, found: 519.1968.

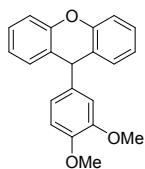

9-(3,4-dimethoxyphenyl)-9H-xanthene (**4c**). Mp: 98-101 °C. Compound **4c** was purified by flash column chromatography (PE/EtOAc = 6:1) as a white solid (113 mg, 71% yield). IR (neat):  $\nu_{\max}$  3020, 2960, 2830, 1654, 1513, 1479, 1448, 1258, 1138, 1026, 801, 751, 645.  $^1\text{H}$  NMR (400M Hz,  $\text{CDCl}_3/\text{TMS}$ ):  $\delta$  7.20 (t,  $J = 8.0$  Hz, 2H),  $\delta$  7.12 (d,  $J = 8.0$  Hz, 2H),  $\delta$  7.05 (d,  $J = 8.0$  Hz, 2H),  $\delta$  6.98 (t,  $J = 8.0$  Hz, 2H),

$\delta$  6.78 (s, 2H),  $\delta$  6.65 (s, 1H),  $\delta$  5.19 (s, 1H),  $\delta$  3.83 (s, 3H),  $\delta$  3.75 (s, 3H).  $^{13}\text{C}$  NMR (100M Hz,  $\text{CDCl}_3/\text{TMS}$ ): 151.08, 149.28, 147.89, 139.04, 129.70, 127.92, 124.65, 123.28, 120.71, 116.56, 111.60, 111.10, 55.901, 55.895, 44.00. HRMS (ESI):  $m/z$  calcd for  $\text{C}_{21}\text{H}_{19}\text{O}_3$   $[\text{M}+\text{H}]^+$ : 319.1334, found: 319.1335.

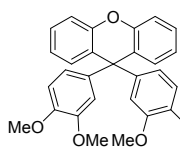

9,9-bis(3,4-dimethoxyphenyl)-9H-xanthene (**4d**). Mp: 129-132 °C. Compound **4d** was purified by flash column chromatography (PE/EtOAc = 5:1) as a white solid (148 mg, 65% yield). IR (neat):  $\nu_{\text{max}}$  3031, 2973, 2839, 1639, 1517, 1464, 1445, 1255, 1242, 1140, 1036, 1023, 876, 759.  $^1\text{H}$  NMR (400M Hz,  $\text{CDCl}_3/\text{TMS}$ ):  $\delta$  7.26 (t,  $J = 8.0$  Hz, 2H),  $\delta$  7.16 (d,  $J = 8.0$  Hz, 2H),  $\delta$  7.05 (t,  $J = 8.0$  Hz, 2H),  $\delta$  6.97 (d,  $J = 8.0$  Hz, 2H),  $\delta$  6.72 (d,  $J = 8.0$  Hz, 2H),  $\delta$  6.56 (d,  $J = 2.0$  Hz, 2H),  $\delta$  6.41 (dd,  $J_1 = 2.0$  Hz,  $J_2 = 8.0$  Hz, 2H),  $\delta$  3.85 (s, 3H),  $\delta$  3.61 (s, 3H).  $^{13}\text{C}$  NMR (100M Hz,  $\text{CDCl}_3/\text{TMS}$ ): 152.61, 148.28, 147.57, 138.29, 130.63, 129.96, 127.94, 122.80, 122.46, 116.51, 113.45, 110.01, 55.85, 55.77, 53.76. HRMS (ESI):  $m/z$  calcd for  $\text{C}_{29}\text{H}_{27}\text{O}_5$   $[\text{M}+\text{H}]^+$ : 455.1858, found: 455.1855.

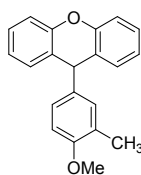

9-(4-methoxy-3-methylphenyl)-9H-xanthene (**5c**). Mp: 77-80 °C. Compound **5c** was purified by flash column chromatography (PE/EtOAc = 30:1) as a yellow solid (48 mg, 32% yield). IR (neat):  $\nu_{\text{max}}$  3021, 3003, 2954, 2833, 1602, 1573, 1480, 1258, 1131, 1029, 890, 754, 623, 524, 496.  $^1\text{H}$  NMR (400M Hz,  $\text{CDCl}_3/\text{TMS}$ ):  $\delta$  7.21 (t,  $J = 8.0$  Hz, 2H),  $\delta$  7.13 (d,  $J = 8.0$  Hz, 2H),  $\delta$  7.06 (d,  $J = 8.0$  Hz, 2H),  $\delta$  7.00-6.96 (m, 4H),  $\delta$  6.73 (d,  $J = 8.0$  Hz, 1H),  $\delta$  5.18 (s, 1H),  $\delta$  3.78 (s, 3H),  $\delta$  2.15 (s, 3H).  $^{13}\text{C}$  NMR (100M Hz,  $\text{CDCl}_3/\text{TMS}$ ): 156.60, 151.09, 138.53, 130.75, 129.84, 127.82, 127.04, 126.69, 124.98, 123.29, 116.58, 109.94, 55.38, 43.67, 16.52. HRMS (ESI):  $m/z$  calcd for  $\text{C}_{21}\text{H}_{19}\text{O}_2$   $[\text{M}+\text{H}]^+$ : 303.1385, found: 303.1388.

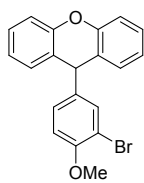

9-(3-bromo-4-methoxyphenyl)-9H-xanthene (**6c**). Mp: 57-60 °C.

Compound **6c** was purified by flash column chromatography (PE/EtOAc = 40:1) as a yellow solid (46 mg, 25% yield). IR (neat):  $\nu_{\max}$  3022, 2924, 2832, 1600, 1570, 1480, 1444, 1252, 1053, 883, 759, 730, 650.  $^1\text{H}$  NMR (400M Hz,  $\text{CDCl}_3/\text{TMS}$ ):  $\delta$  7.38 (d,  $J$  = 2.4 Hz, 1H),  $\delta$  7.21 (t,  $J$  = 8.0 Hz, 2H),  $\delta$  7.12 (d,  $J$  = 8.0 Hz, 2H),  $\delta$  7.08-6.97 (m, 5H),  $\delta$  6.79 (d,  $J$  = 8.0 Hz, 1H),  $\delta$  5.18 (s, 1H),  $\delta$  3.83 (s, 3H).  $^{13}\text{C}$  NMR (100M Hz,  $\text{CDCl}_3/\text{TMS}$ ): 154.75, 151.08, 140.40, 133.19, 129.73, 128.51, 128.18, 124.12, 123.43, 116.78, 112.27, 112.02, 56.30, 43.39. HRMS (ESI):  $m/z$  calcd for  $\text{C}_{20}\text{H}_{16}\text{BrO}_2$   $[\text{M}+\text{H}]^+$ : 367.0334, found: 367.0330.

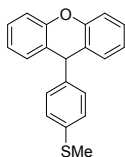

9-(4-(methylthio)phenyl)-9H-xanthene (**7c**). Mp: 79-80 °C. Compound **7c**

was purified by flash column chromatography (PE/EtOAc = 30:1) as a white solid (49 mg, 32% yield). IR (neat):  $\nu_{\max}$  3024, 2924, 2830, 1636, 1600, 1480, 1447, 1314, 1255, 1094, 863, 752, 618.  $^1\text{H}$  NMR (400M Hz,  $\text{CDCl}_3/\text{TMS}$ ):  $\delta$  7.23-7.11 (m, 8H),  $\delta$  7.05 (d,  $J$  = 8.0 Hz, 2H),  $\delta$  6.98 (t,  $J$  = 8.0 Hz, 2H),  $\delta$  5.22 (s, 1H),  $\delta$  2.43 (s, 3H).  $^{13}\text{C}$  NMR (100M Hz,  $\text{CDCl}_3/\text{TMS}$ ): 151.16, 143.60, 136.75, 129.77, 128.99, 128.07, 127.18, 124.39, 123.37, 116.71, 44.00, 16.02. HRMS (ESI):  $m/z$  calcd for  $\text{C}_{20}\text{H}_{17}\text{OS}$   $[\text{M}+\text{H}]^+$ : 305.1000, found: 305.1006.

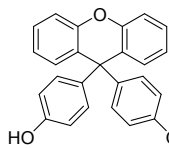

4,4'-(9H-xanthene-9,9-diyl)diphenol (**8d**).<sup>2</sup> Mp: 235-239 °C.

Compound **8d** was purified by flash column chromatography (PE/EtOAc = 2:1) as off-white solid (139 mg, 76% yield). IR (neat):  $\nu_{\max}$  3443, 3030, 1614, 1597, 1509, 1472, 1444, 1237, 1174, 870, 823, 756, 584.  $^1\text{H}$  NMR (400M Hz,  $\text{CDCl}_3/\text{TMS}$ ):  $\delta$  7.26 (t,  $J$  = 8.0 Hz, 2H),  $\delta$  7.14 (d,  $J$  = 8.0 Hz, 2H),  $\delta$  7.04 (t,  $J$  = 8.0 Hz, 2H),  $\delta$  6.92 (d,  $J$  = 8.0 Hz, 2H),  $\delta$  6.82 (d,  $J$  = 8.0 Hz, 4H),  $\delta$  6.69 (d,  $J$  = 8.0 Hz, 4H),  $\delta$  4.69 (s, 2H).  $^{13}\text{C}$  NMR (100M Hz,  $\text{CDCl}_3/\text{TMS}$ ): 154.12, 152.58, 138.40, 131.37, 130.87,

130.11, 127.90, 122.94, 116.55, 114.79, 53.21. HRMS (ESI):  $m/z$  calcd for  $C_{25}H_{19}O_3$   $[M+H]^+$ : 367.1334, found: 367.1338.

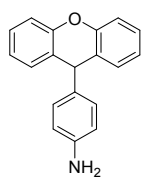

4-(9*H*-xanthen-9-yl)aniline (**9c**). Mp: 175-180 °C. Compound **9c** was purified by flash column chromatography (PE/EtOAc = 10:1) as a brown solid (48 mg, 35% yield). IR (neat):  $\nu_{\max}$  3391, 3004, 1623, 1599, 1570, 1513, 1481, 1445, 1252, 1211, 863, 750, 513.  $^1H$  NMR (400M Hz,  $CDCl_3/TMS$ ):  $\delta$  7.17 (t,  $J = 8.0$  Hz, 2H),  $\delta$  7.09 (d,  $J = 8.0$  Hz, 2H),  $\delta$  7.04 (d,  $J = 8.0$  Hz, 2H),  $\delta$  6.97-6.94 (m, 4H),  $\delta$  6.57 (d,  $J = 8.0$  Hz, 2H),  $\delta$  5.13 (s, 1H),  $\delta$  3.54 (s, 2H).  $^{13}C$  NMR (100M Hz,  $CDCl_3/TMS$ ): 151.19, 145.09, 136.93, 129.83, 129.46, 127.76, 125.13, 123.24, 116.53, 115.50, 43.63. HRMS (ESI):  $m/z$  calcd for  $C_{19}H_{16}NO$   $[M+H]^+$ : 274.1232, found: 274.1233.

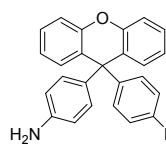

4,4'-(9*H*-xanthene-9,9-diyl)dianiline (**9d**). Mp: 267-270°C. Compound **9d** was purified by flash column chromatography (PE/EtOAc = 3:1) as a black solid (100 mg, 55% yield). IR (neat):  $\nu_{\max}$  3366, 3020, 1619, 1511, 1471, 1440, 1296, 1239, 1184, 872, 761, 584.  $^1H$  NMR (400M Hz,  $CDCl_3/TMS$ ):  $\delta$  7.23 (t,  $J = 8.0$  Hz, 2H),  $\delta$  7.12 (d,  $J = 8.0$  Hz, 2H),  $\delta$  7.02 (t,  $J = 8.0$  Hz, 2H),  $\delta$  6.97 (d,  $J = 8.0$  Hz, 2H),  $\delta$  6.74 (d,  $J = 8.0$  Hz, 4H),  $\delta$  6.54 (d,  $J = 8.0$  Hz, 4H),  $\delta$  3.60 (s, 4H).  $^{13}C$  NMR (100M Hz,  $CDCl_3/TMS$ ): 152.59, 144.68, 136.39, 131.28, 131.01, 130.22, 127.59, 122.74, 116.39, 114.58, 53.10. HRMS (ESI):  $m/z$  calcd for  $C_{25}H_{21}N_2O$   $[M+H]^+$ : 365.1654, found: 365.1658.

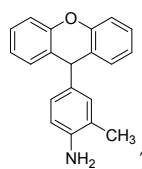

2-methyl-4-(9*H*-xanthen-9-yl)aniline (**10c**). Mp: 98-102 °C. Compound **10c** was purified by flash column chromatography (PE/EtOAc = 10:1) as a brown solid (49 mg, 34% yield). IR (neat):  $\nu_{\max}$  3377, 3010, 2922, 1625, 1506, 1477, 1454, 1244, 1207, 1180, 1195, 873, 769, 756, 582.  $^1H$  NMR (400M Hz,  $CDCl_3/TMS$ ):  $\delta$



7.20 (t,  $J = 8.0$  Hz, 2H),  $\delta$  7.12 (d,  $J = 8.0$  Hz, 2H),  $\delta$  7.08 (d,  $J = 8.0$  Hz, 2H),  $\delta$  6.98 (t,  $J = 8.0$  Hz, 2H),  $\delta$  6.87 (m, 2H),  $\delta$  6.58 (d,  $J = 8.0$  Hz, 1H),  $\delta$  5.13 (s, 1H),  $\delta$  3.51 (s, 2H),  $\delta$  2.09 (s, 3H).  $^{13}\text{C}$  NMR (100M Hz,  $\text{CDCl}_3/\text{TMS}$ ): 151.08, 143.28, 137.04, 130.56, 129.87, 127.69, 127.07, 125.18, 123.22, 122.75, 116.48, 115.19, 43.62, 17.63. HRMS (ESI):  $m/z$  calcd for  $\text{C}_{20}\text{H}_{18}\text{NO}$   $[\text{M}+\text{H}]^+$ : 288.1388, found: 288.1386.

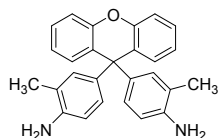

4,4'-(9H-xanthene-9,9-diyl)bis(2-methylaniline) (**10d**). Mp: 230-235 °C. Compound **10d** was purified by flash column chromatography (PE/EtOAc = 3:1) as a black solid (120 mg, 61% yield). IR (neat):  $\nu_{\text{max}}$  3359, 3010, 2924, 1624, 1596, 1502, 1474, 1442, 1292, 1276, 1238, 818, 755, 613.  $^1\text{H}$  NMR (400M Hz,  $\text{DMSO-d}_6/\text{TMS}$ ):  $\delta$  7.22 (t,  $J = 8.0$  Hz, 2H),  $\delta$  7.10 (d,  $J = 8.0$  Hz, 2H),  $\delta$  7.03 (t,  $J = 8.0$  Hz, 2H),  $\delta$  6.88 (d,  $J = 8.0$  Hz, 2H),  $\delta$  6.47-6.37 (m, 6H),  $\delta$  4.77 (s, 4H),  $\delta$  1.89 (s, 6H).  $^{13}\text{C}$  NMR (100M Hz,  $\text{DMSO-d}_6/\text{TMS}$ ): 151.49, 144.72, 133.61, 131.21, 131.04, 130.04, 127.74, 127.47, 122.81, 120.17, 115.77, 113.15, 52.17, 17.88. HRMS (ESI):  $m/z$  calcd for  $\text{C}_{27}\text{H}_{25}\text{N}_2\text{O}$   $[\text{M}+\text{H}]^+$ : 393.1967, found: 393.1970.

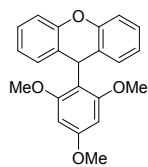

9-(2,4,6-trimethoxyphenyl)-9H-xanthene (**11c**). Mp: 40-41 °C.

Compound **11c** was purified by flash column chromatography (PE/EtOAc = 5:1) as a white solid (78 mg, 45% yield). IR (neat):  $\nu_{\text{max}}$  3020, 3003, 2918, 2837, 1605, 1482, 1451, 1259, 1205, 1121, 750, 633, 504.  $^1\text{H}$  NMR (400M Hz,  $\text{CDCl}_3/\text{TMS}$ ):  $\delta$  7.12 (t,  $J = 8.0$  Hz, 2H),  $\delta$  7.02 (d,  $J = 8.0$  Hz, 2H),  $\delta$  6.95 (d,  $J = 8.0$  Hz, 2H),  $\delta$  6.87 (t,  $J = 8.0$  Hz, 2H),  $\delta$  6.10 (s, 2H),  $\delta$  5.94 (s, 1H),  $\delta$  3.78 (s, 9H).  $^{13}\text{C}$  NMR (100M Hz,  $\text{CDCl}_3/\text{TMS}$ ): 161.60, 160.17, 151.60, 128.73, 126.96, 124.81, 122.38, 116.60, 115.50, 92.93, 55.99, 55.43, 55.33. HRMS (ESI):  $m/z$  calcd for  $\text{C}_{22}\text{H}_{21}\text{O}_4$   $[\text{M}+\text{H}]^+$ : 349.1440, found: 349.1445.

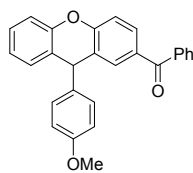

(9-(4-methoxyphenyl)-9H-xanthen-2-yl)(phenyl)methanone (**12c**).

Mp: 47-50 °C. Compound **12c** was purified by flash column chromatography (PE/EtOAc = 10:1) as a white solid (167 mg, 85% yield). IR (neat):  $\nu_{\max}$  3010, 2925, 2831, 1650, 1605, 1509, 1479, 1453, 1255, 1175, 1030, 755, 698.  $^1\text{H}$  NMR (400M Hz,  $\text{CDCl}_3/\text{TMS}$ ):  $\delta$  7.68-7.66 (m, 3H),  $\delta$  7.62 (s, 1H),  $\delta$  7.54 (t,  $J = 8.0$  Hz, 1H),  $\delta$  7.42 (t,  $J = 8.0$  Hz, 2H),  $\delta$  7.23-7.14 (m, 3H),  $\delta$  7.10-7.06 (m, 3H),  $\delta$  7.02 (t,  $J = 8.0$  Hz, 1H),  $\delta$  6.80 (d,  $J = 8.0$  Hz, 2H),  $\delta$  5.24 (s, 1H),  $\delta$  3.75 (s, 3H).  $^{13}\text{C}$  NMR (100M Hz,  $\text{CDCl}_3/\text{TMS}$ ): 195.36, 158.57, 154.42, 150.61, 138.53, 137.93, 132.87, 132.58, 132.23, 130.56, 130.00, 129.92, 129.43, 128.28, 128.22, 124.99, 124.34, 124.07, 116.77, 116.61, 114.37, 55.26, 43.38. HRMS (ESI):  $m/z$  calcd for  $\text{C}_{27}\text{H}_{21}\text{O}_3$   $[\text{M}+\text{H}]^+$ : 393.1491, found: 393.1490.

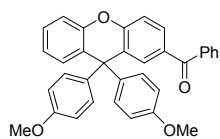

(9,9-bis(4-methoxyphenyl)-9H-xanthen-2-yl)(phenyl)methanone

(**12d**). Mp: 75-78 °C. Compound **12d** was purified by flash column chromatography (PE/EtOAc = 10:1) as a yellow solid (187 mg, 75% yield). IR (neat):  $\nu_{\max}$  3020, 2953, 1654, 1601, 1508, 1474, 1448, 1267, 1251, 1178, 1097, 1033, 760, 584.  $^1\text{H}$  NMR (400M Hz,  $\text{CDCl}_3/\text{TMS}$ ):  $\delta$  7.80 (dd,  $J_1 = 2.0$  Hz,  $J_2 = 8.0$  Hz, 1H),  $\delta$  7.65 (d,  $J = 8.0$  Hz, 2H),  $\delta$  7.54-7.49 (m, 2H),  $\delta$  7.38 (t,  $J = 8.0$  Hz, 2H),  $\delta$  7.30-7.23 (m, 2H),  $\delta$  7.19 (d,  $J = 8.0$  Hz, 1H),  $\delta$  7.09 (t,  $J = 8.0$  Hz, 1H),  $\delta$  6.97 (d,  $J = 8.0$  Hz, 1H),  $\delta$  6.89 (d,  $J = 8.0$  Hz, 4H),  $\delta$  6.77 (d,  $J = 8.0$  Hz, 4H),  $\delta$  3.77 (s, 6H).  $^{13}\text{C}$  NMR (100M Hz,  $\text{CDCl}_3/\text{TMS}$ ): 195.31, 158.24, 155.56, 151.76, 137.80, 137.69, 133.42, 132.26, 132.13, 131.02, 130.70, 130.64, 130.32, 130.14, 130.12, 130.05, 128.20, 123.67, 116.80, 116.63, 113.42, 55.35, 53.08. HRMS (ESI):  $m/z$  calcd for  $\text{C}_{34}\text{H}_{27}\text{O}_4$   $[\text{M}+\text{H}]^+$ : 499.1909, found: 499.1912.

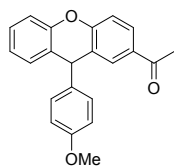

1-(9-(4-methoxyphenyl)-9H-xanthen-2-yl)ethan-1-one (**13c**). Mp: 86-

88 °C. Compound **13c** was purified by flash column chromatography (PE/EtOAc = 5:1) as a white solid (109 mg, 66% yield). IR (neat):  $\nu_{\max}$  2924, 1679, 1605, 1540, 1482, 1454, 1358, 1262, 1173, 1027, 823, 757, 578. <sup>1</sup>H NMR (400M Hz, CDCl<sub>3</sub>/TMS):  $\delta$  7.82 (dd,  $J_1 = 2.0$  Hz,  $J_2 = 8.0$  Hz, 1H),  $\delta$  7.72 (s, 1H),  $\delta$  7.22 (t,  $J = 8.0$  Hz, 1H),  $\delta$  7.18-7.00 (m, 6H),  $\delta$  6.81 (d,  $J = 8.0$  Hz, 2H),  $\delta$  5.24 (s, 1H),  $\delta$  3.76 (s, 3H),  $\delta$  2.49 (s, 3H). <sup>13</sup>C NMR (100M Hz, CDCl<sub>3</sub>/TMS): 196.85, 158.55, 154.75, 150.44, 138.55, 132.69, 130.90, 129.87, 129.39, 128.70, 128.20, 124.99, 124.35, 124.09, 116.86, 116.75, 114.38, 55.36, 43.44, 26.58. HRMS (ESI):  $m/z$  calcd for C<sub>22</sub>H<sub>19</sub>O<sub>3</sub> [M+H]<sup>+</sup>: 331.1334, found: 331.1338.

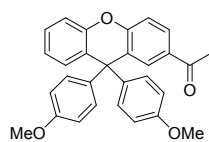

1-(9,9-bis(4-methoxyphenyl)-9H-xanthen-2-yl)ethan-1-one (**13d**).

Mp: 60-62 °C. Compound **13d** was purified by flash column chromatography (PE/EtOAc = 5:1) as a white solid (133 mg, 61% yield). IR (neat):  $\nu_{\max}$  3030, 3003, 2930, 2835, 1680, 1603, 1509, 1476, 1450, 1261, 1179, 1033, 759, 584. <sup>1</sup>H NMR (400M Hz, CDCl<sub>3</sub>/TMS):  $\delta$  7.88 (dd,  $J_1 = 2.4$  Hz,  $J_2 = 8.0$  Hz, 1H),  $\delta$  7.64 (d,  $J = 2.4$  Hz, 1H),  $\delta$  7.27 (t,  $J = 8.0$  Hz, 1H),  $\delta$  7.18 (t,  $J = 8.0$  Hz, 2H),  $\delta$  7.07 (dt,  $J_1 = 1.2$  Hz,  $J_2 = 8.0$  Hz, 1H),  $\delta$  6.91 (dd,  $J_1 = 1.2$  Hz,  $J_2 = 8.0$  Hz, 1H),  $\delta$  6.86 (d,  $J = 8.0$  Hz, 4H),  $\delta$  6.77 (d,  $J = 8.0$  Hz, 4H),  $\delta$  3.77 (s, 6H),  $\delta$  2.46 (s, 3H). <sup>13</sup>C NMR (100M Hz, CDCl<sub>3</sub>/TMS): 196.96, 158.30, 156.06, 151.74, 137.66, 135.51, 134.02, 132.47, 131.04, 130.96, 130.30, 128.61, 128.17, 123.64, 116.84, 116.58, 113.48, 55.34, 55.18, 26.65. HRMS (ESI):  $m/z$  calcd for C<sub>29</sub>H<sub>25</sub>O<sub>4</sub> [M+H]<sup>+</sup>: 437.1753, found: 437.1750.

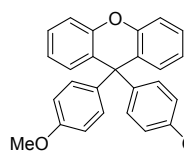

9-(4-ethoxyphenyl)-9-(4-methoxyphenyl)-9H-xanthene (**14d**). Mp: 123-125 °C. Compound **14d** was purified by flash column chromatography (PE/EtOAc = 30:1) as a white solid (98 mg, 48% yield). IR (neat):  $\nu_{\max}$  3034, 2986,

2926, 2899, 1606, 1579, 1508, 1474, 1442, 1301, 1250, 1175, 1038, 872, 761, 640. <sup>1</sup>H NMR (400M Hz, CDCl<sub>3</sub>/TMS): δ 7.26 (t, *J* = 8.0 Hz, 2H), δ 7.16 (d, *J* = 8.0 Hz, 2H), δ 7.05 (t, *J* = 8.0 Hz, 2H), δ 6.95 (d, *J* = 8.0 Hz, 2H), δ 6.90-6.87 (m, 4H), δ 6.79-6.76 (m, 4H), δ 4.00 (q, *J* = 6.8 Hz, 2H), δ 3.78 (s, 3H), δ 1.40 (t, *J* = 6.8 Hz, 3H). <sup>13</sup>C NMR (100M Hz, CDCl<sub>3</sub>/TMS): 157.93, 157.35, 152.43, 138.12, 137.91, 130.99, 130.98, 130.81, 130.01, 127.70, 122.76, 116.38, 113.59, 113.09, 63.31, 55.19, 53.04, 14.89. HRMS (ESI): *m/z* calcd for C<sub>28</sub>H<sub>25</sub>O<sub>3</sub> [M+H]<sup>+</sup>: 409.1804, found: 409.1809.

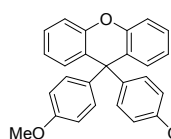

9-(4-methoxyphenyl)-9-(4-phenoxyphenyl)-9H-xanthene (**15d**). Mp: 115-117 °C. Compound **15d** was purified by flash column chromatography (PE/EtOAc = 30:1) as a white solid (125 mg, 55% yield). IR (neat):  $\nu_{\max}$  3010, 2924, 1605, 1587, 1489, 1467, 1442, 1232, 1178, 1036, 867, 776, 764, 750. <sup>1</sup>H NMR (400M Hz, CDCl<sub>3</sub>/TMS): δ 7.52 (t, *J* = 8.0 Hz, 2H), δ 7.47 (t, *J* = 8.0 Hz, 2H), δ 7.36 (d, *J* = 8.0 Hz, 2H), δ 7.37-7.22 (m, 5H), δ 7.16-7.05 (m, 8H), δ 6.98 (d, *J* = 8.0 Hz, 2H), δ 3.97 (s, 3H). <sup>13</sup>C NMR (100M Hz, CDCl<sub>3</sub>/TMS): 158.18, 156.95, 155.96, 152.58, 140.73, 138.08, 131.36, 131.17, 130.69, 130.13, 129.85, 127.96, 123.55, 122.98, 119.32, 117.84, 116.58, 113.31, 55.38, 53.34. HRMS (ESI): *m/z* calcd for C<sub>32</sub>H<sub>25</sub>O<sub>3</sub> [M+H]<sup>+</sup>: 457.1804, found: 457.1810.

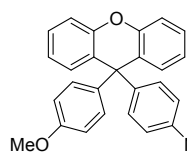

4-(9-(4-methoxyphenyl)-9H-xanthene-9-yl)aniline (**16d**). Mp: 175-179 °C. Compound **16d** was purified by flash column chromatography (PE/EtOAc = 5:1) as a white solid (99 mg, 52% yield). IR (neat):  $\nu_{\max}$  3381, 3003, 2958, 1623, 1507, 1473, 1442, 1302, 1242, 1179, 1096, 871, 759, 637. <sup>1</sup>H NMR (400M Hz, CDCl<sub>3</sub>/TMS): δ 7.24 (t, *J* = 8.0 Hz, 2H), δ 7.14 (d, *J* = 8.0 Hz, 2H), δ 7.03 (t, *J* = 8.0 Hz, 2H), δ 6.95 (d, *J* = 8.0 Hz, 2H), δ 6.88 (d, *J* = 8.0 Hz, 2H), δ 6.77-6.73 (m, 4H), δ 6.55 (d, *J* = 8.0 Hz, 2H), δ 3.77 (s, 3H), δ 3.64 (s, 2H). <sup>13</sup>C NMR (100M Hz, CDCl<sub>3</sub>/TMS): 158.03, 152.59, 144.78, 138.44, 136.18, 131.13, 131.11, 131.02, 130.17, 127.72, 122.82, 116.46, 114.61, 113.19, 55.32, 53.15. HRMS (ESI): *m/z* calcd

for  $C_{26}H_{22}NO_2$   $[M+H]^+$ : 380.1651, found: 380.1655.

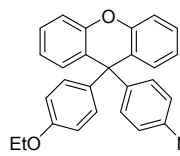

**4-(9-(4-ethoxyphenyl)-9H-xanthen-9-yl)aniline (17d)**. Mp: 179-182 °C. Compound **17d** was purified by flash column chromatography (PE/EtOAc = 5:1) as a white solid (79 mg, 40% yield). IR (neat):  $\nu_{max}$  3474, 3383, 3010, 2969, 2917, 2848, 1619, 1508, 1473, 1441, 1301, 1241, 1179, 1160, 1038, 871, 840, 756.  $^1H$  NMR (400M Hz,  $CDCl_3/TMS$ ):  $\delta$  7.25 (dt,  $J_1 = 1.6$  Hz,  $J_2 = 8.0$  Hz, 2H),  $\delta$  7.14 (d,  $J = 8.0$  Hz, 2H),  $\delta$  7.03 (t,  $J = 8.0$  Hz, 2H),  $\delta$  6.95 (d,  $J = 8.0$  Hz, 2H),  $\delta$  6.87 (d,  $J = 8.0$  Hz, 2H),  $\delta$  6.76-6.73 (m, 4H),  $\delta$  6.55 (d,  $J = 8.0$  Hz, 2H),  $\delta$  3.99 (q,  $J = 6.8$  Hz, 2H),  $\delta$  3.61 (s, 2H),  $\delta$  1.39 (t,  $J = 6.8$  Hz, 3H).  $^{13}C$  NMR (100M Hz,  $CDCl_3/TMS$ ): 157.37, 152.55, 144.75, 138.21, 136.15, 131.10, 130.98, 130.17, 127.69, 122.80, 116.43, 114.57, 113.63, 63.41, 53.10, 15.02. HRMS (ESI):  $m/z$  calcd for  $C_{27}H_{24}NO_2$   $[M+H]^+$ : 394.1807, found: 394.1806.

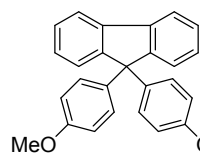

**9,9-bis(4-methoxyphenyl)-9H-fluorene (18d)**. Mp: 112-115 °C. Compound **18d** was purified by flash column chromatography (PE/EtOAc = 30:1) as a white solid (96 mg, 51% yield). IR (neat):  $\nu_{max}$  3011, 2966, 2910, 1619, 1509, 1471, 1301, 1241, 1160, 1035, 840, 766.  $^1H$  NMR (400M Hz,  $CDCl_3/TMS$ ):  $\delta$  7.75 (d,  $J = 8.0$  Hz, 2H),  $\delta$  7.39-7.33 (m, 4H),  $\delta$  7.26 (t,  $J = 8.0$  Hz, 2H),  $\delta$  7.13 (d,  $J = 8.0$  Hz, 4H),  $\delta$  6.75 (d,  $J = 8.0$  Hz, 4H),  $\delta$  3.75 (s, 3H).  $^{13}C$  NMR (100M Hz,  $CDCl_3/TMS$ ): 158.40, 151.97, 140.08, 138.25, 129.29, 127.81, 127.44, 126.13, 120.25, 113.64, 64.28. HRMS (ESI):  $m/z$  calcd for  $C_{27}H_{23}O_2$   $[M+H]^+$ : 379.1698, found: 379.1690

## 5. Copies of NMR spectra

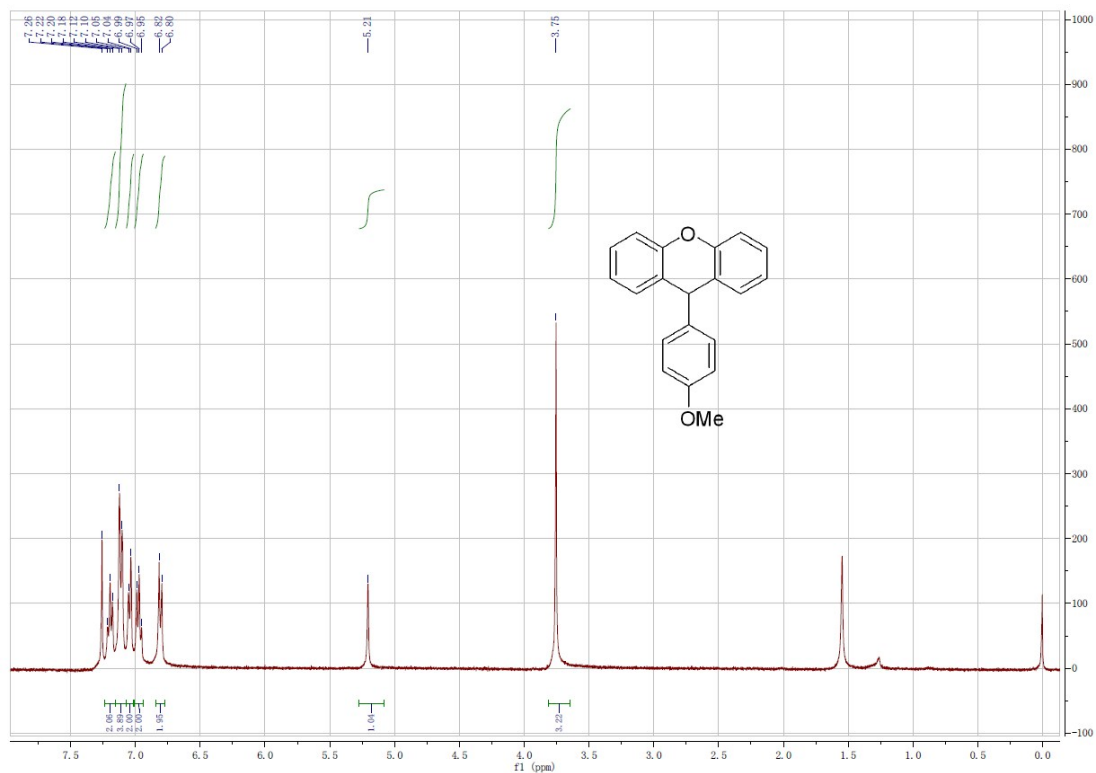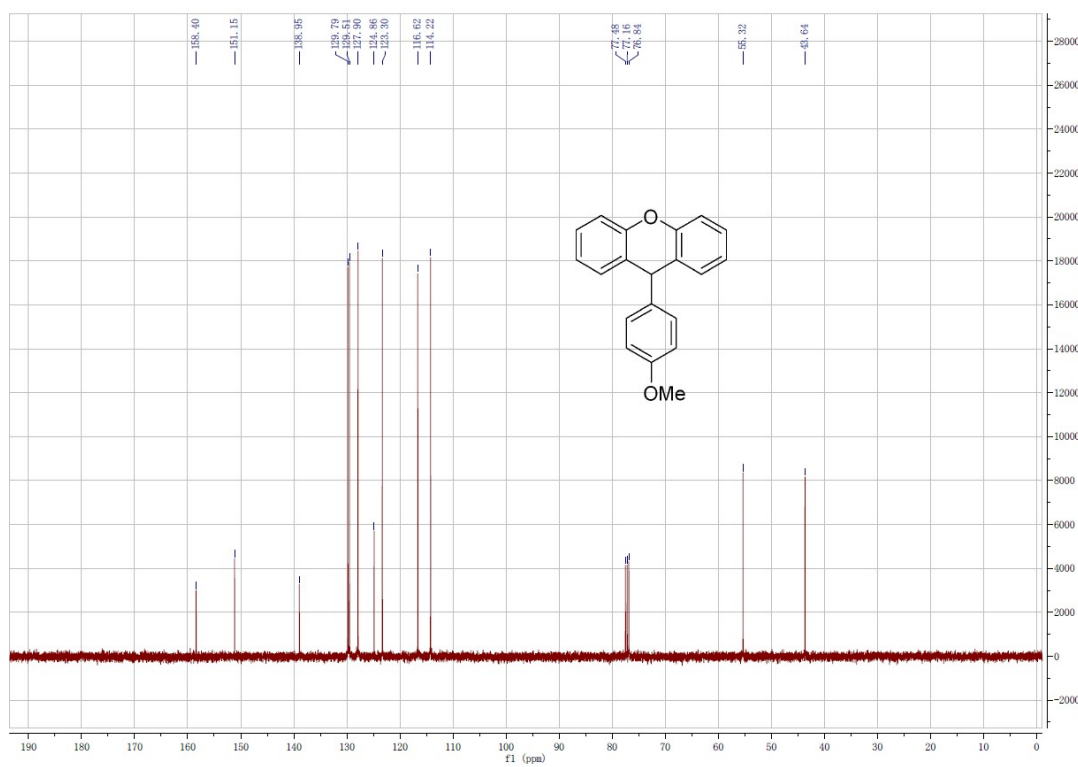

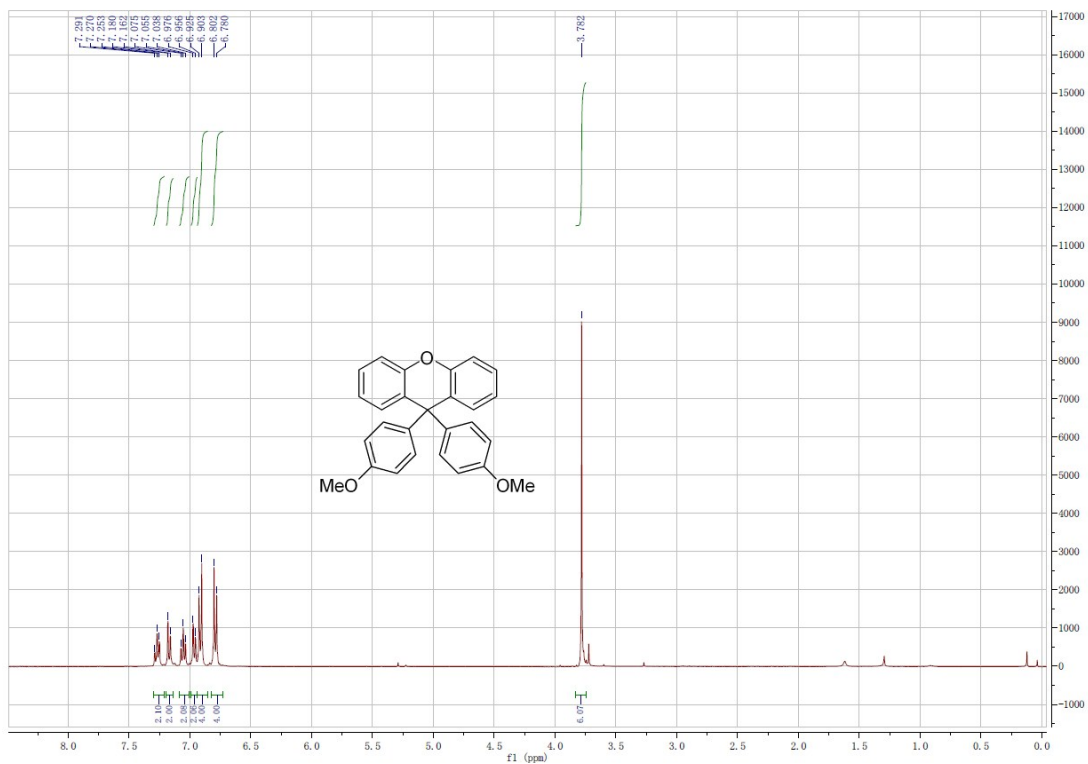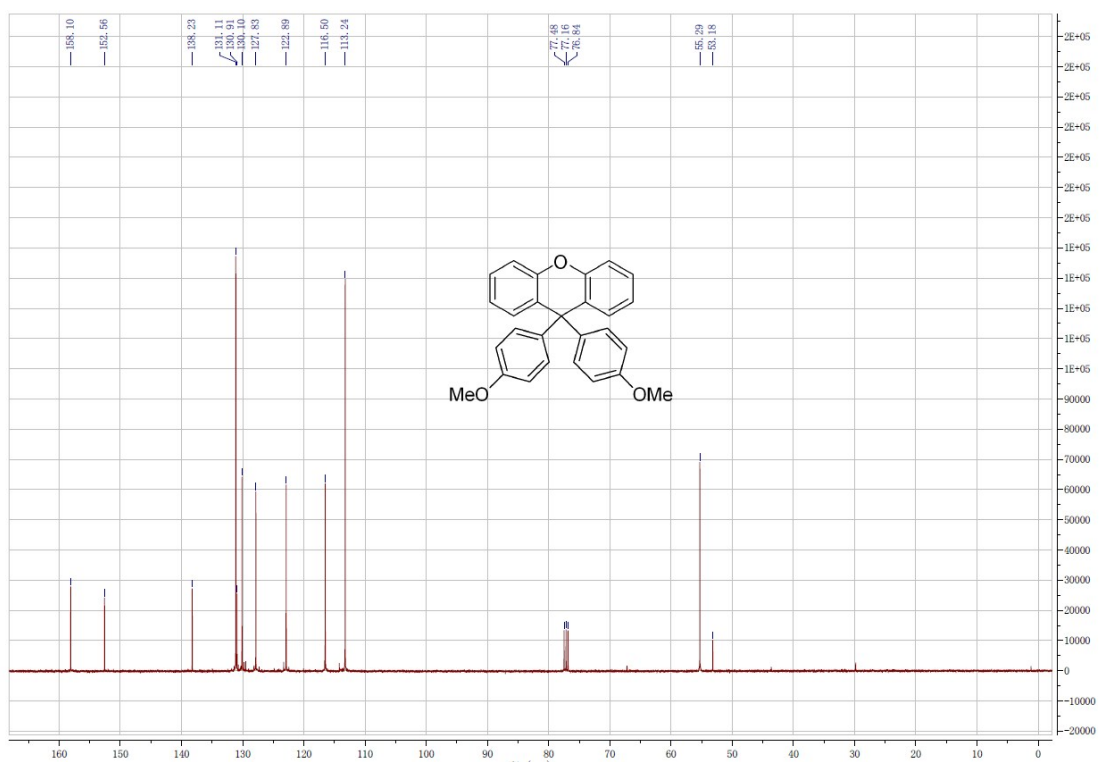

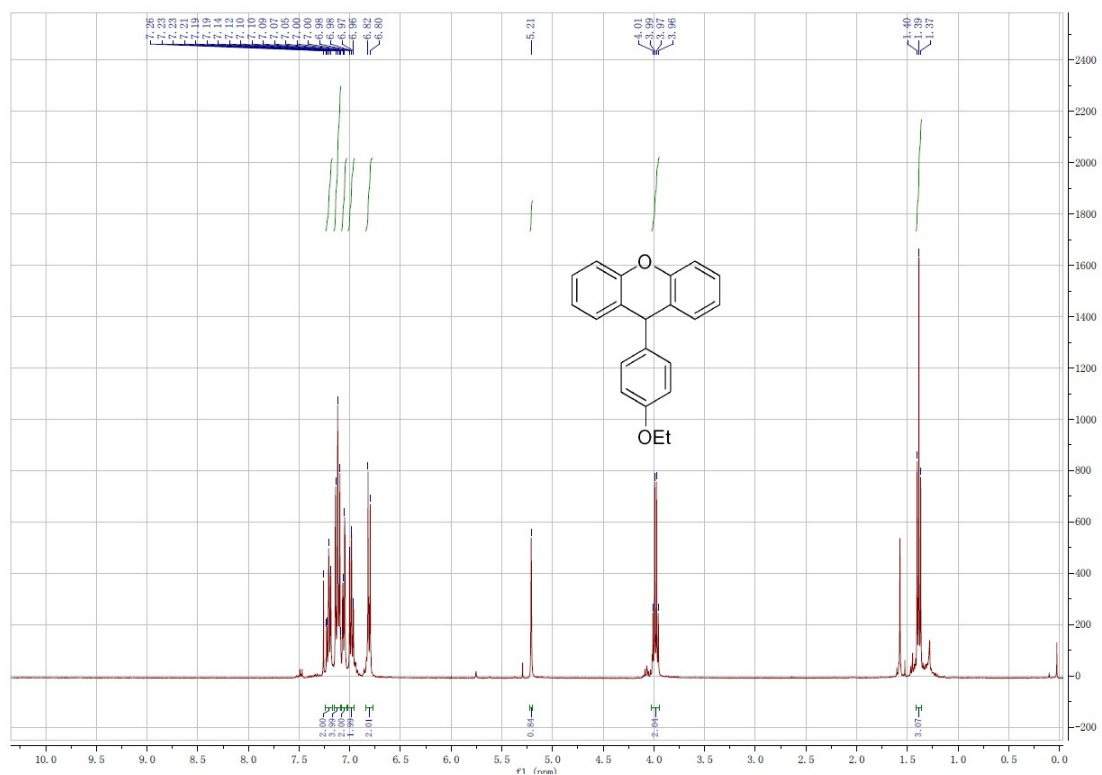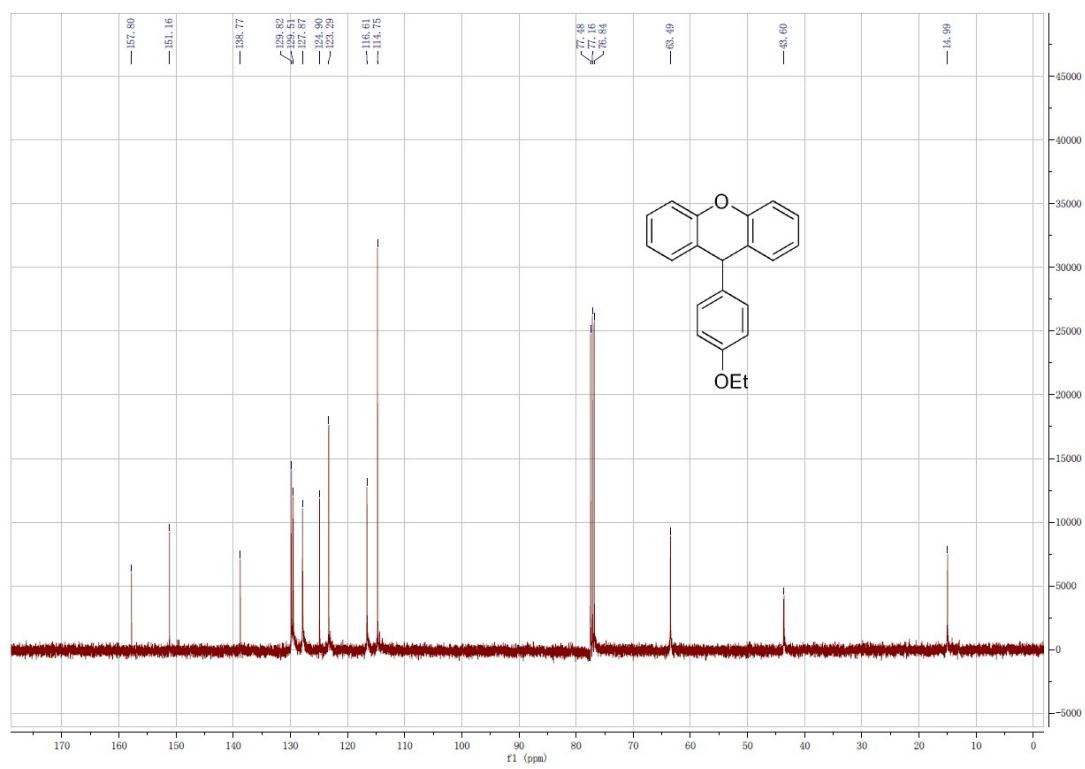



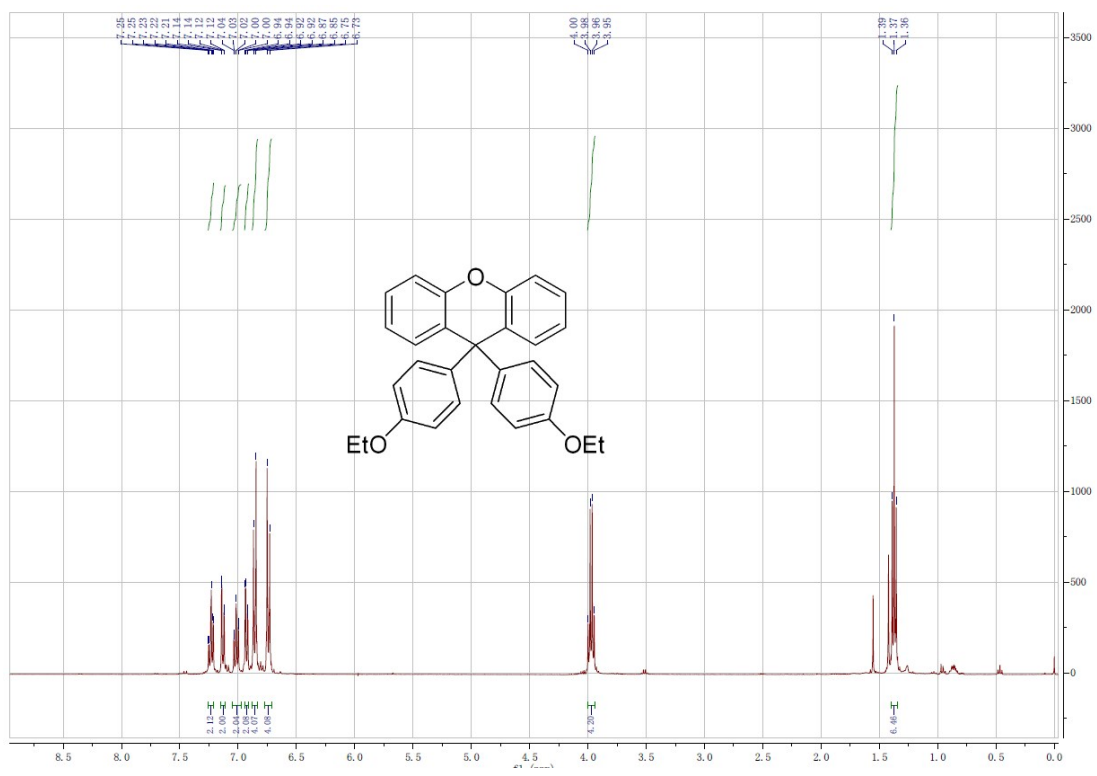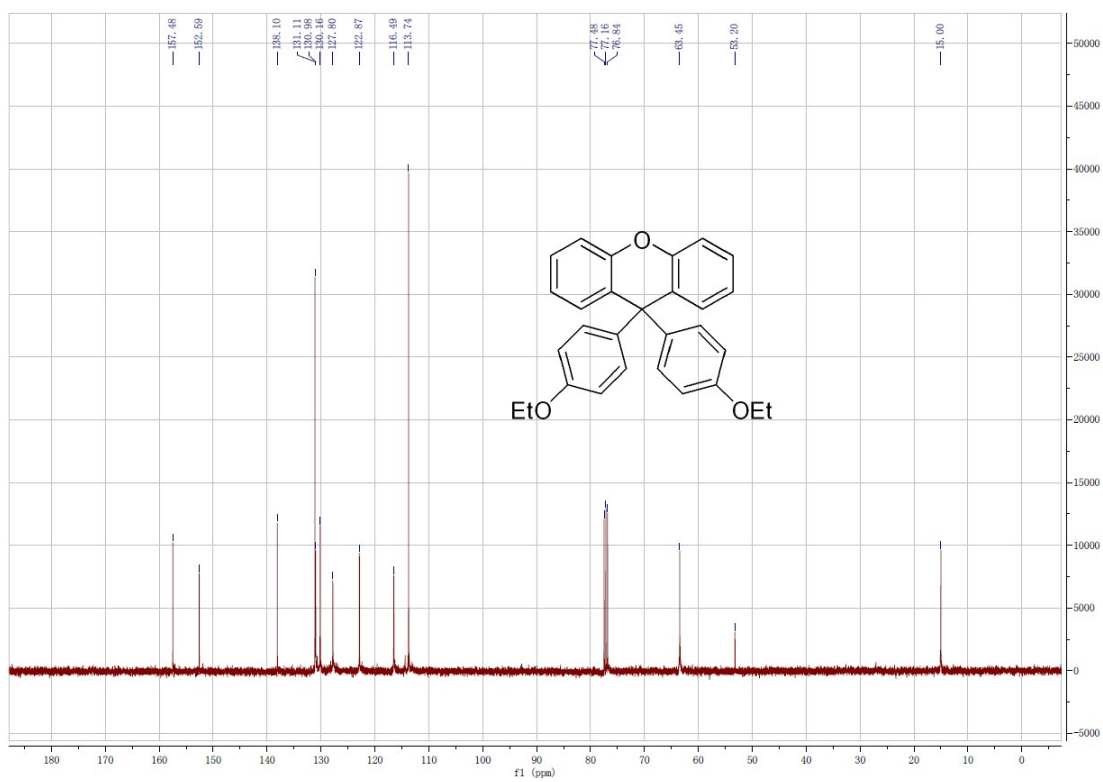



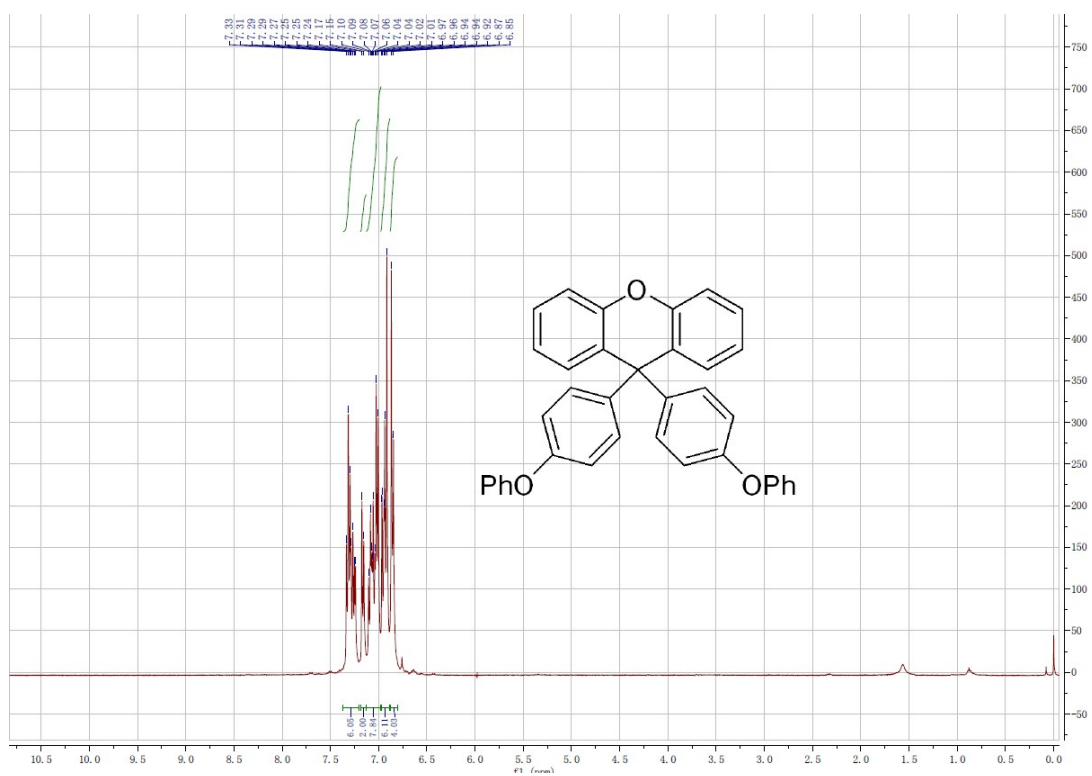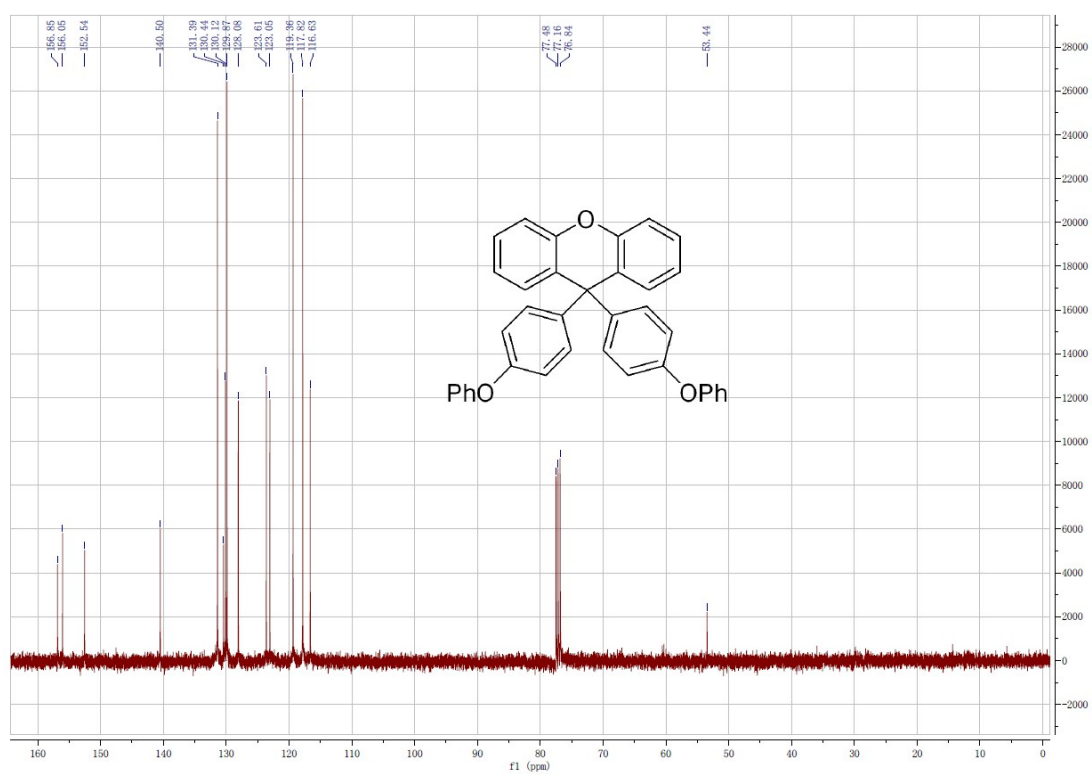

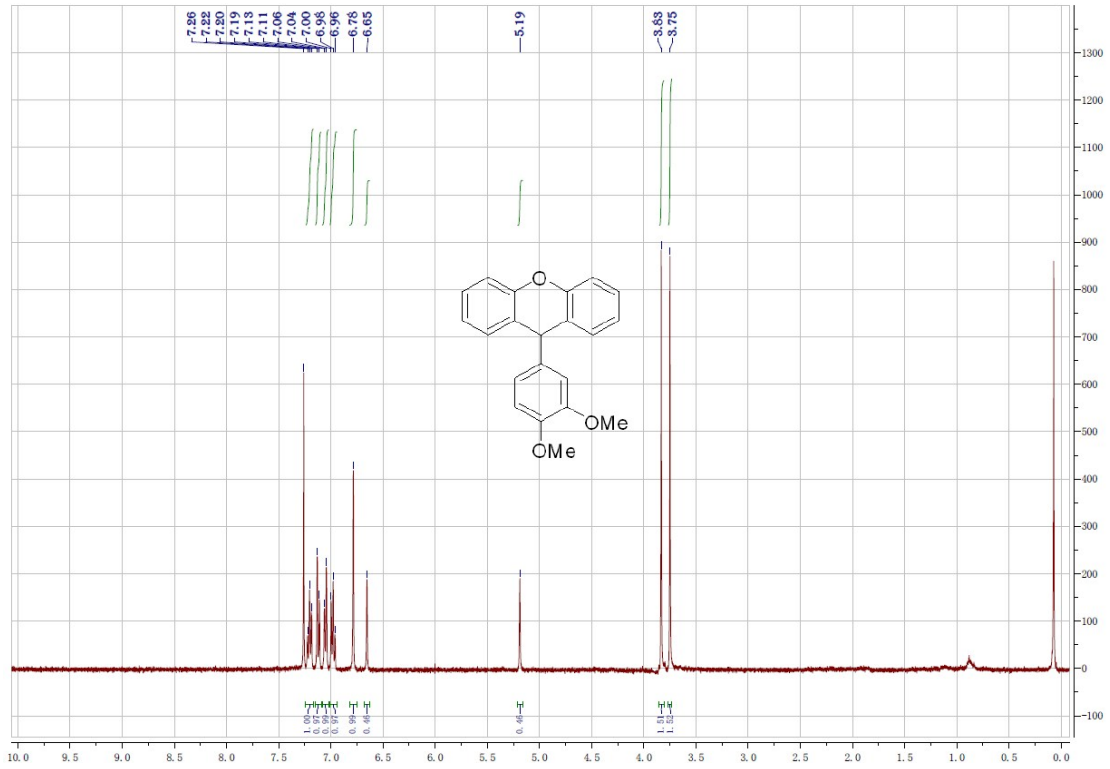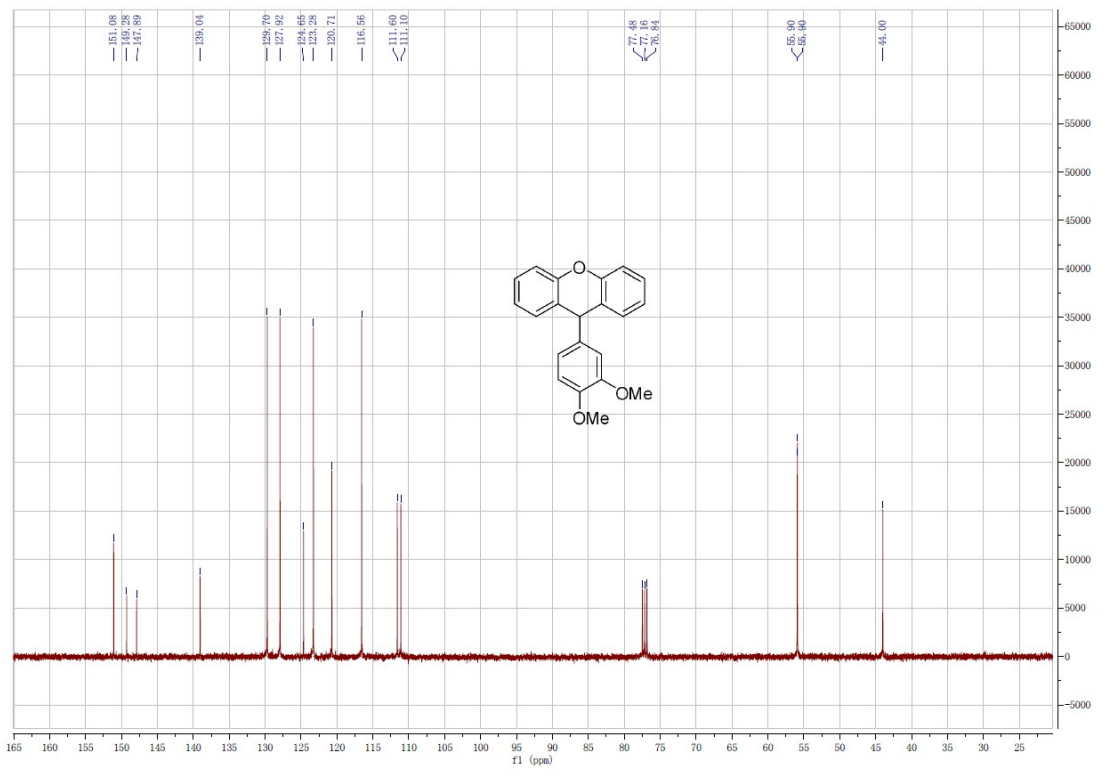

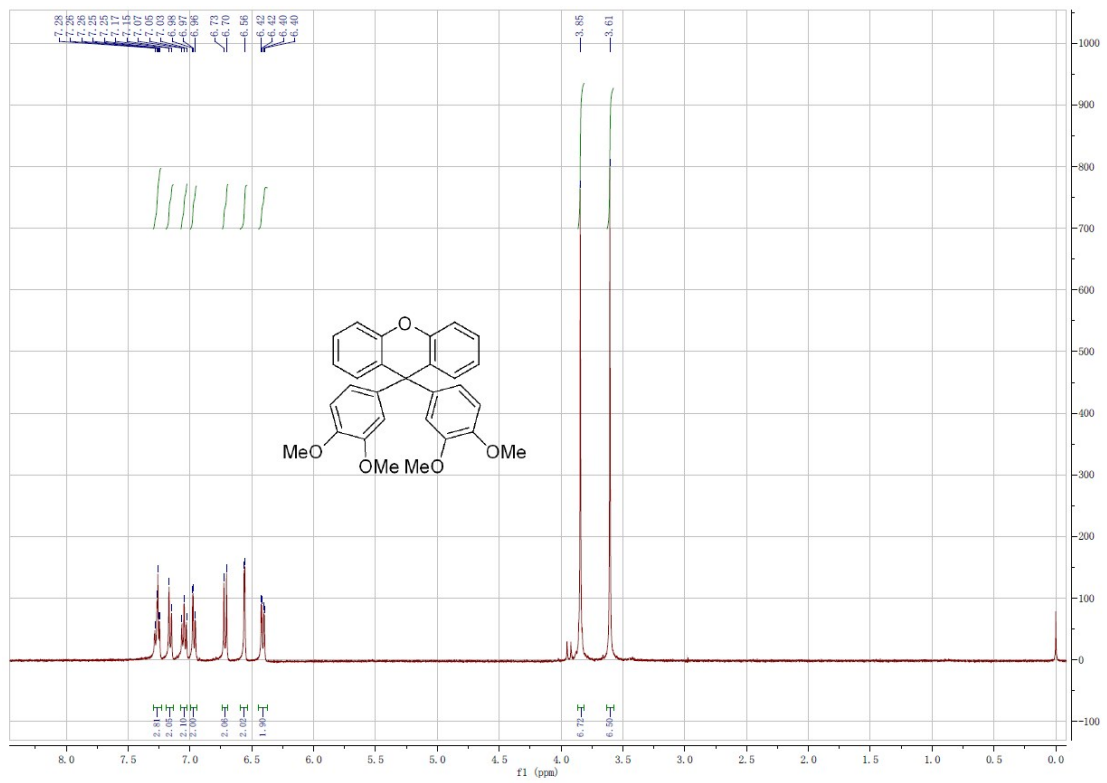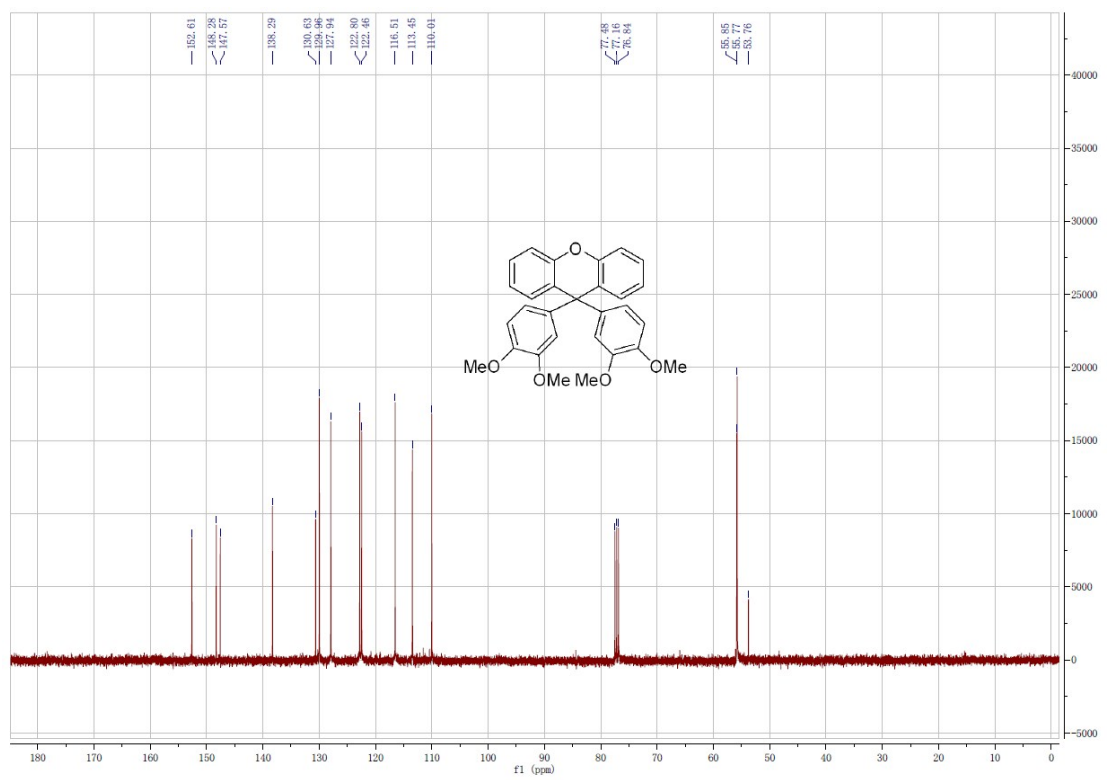

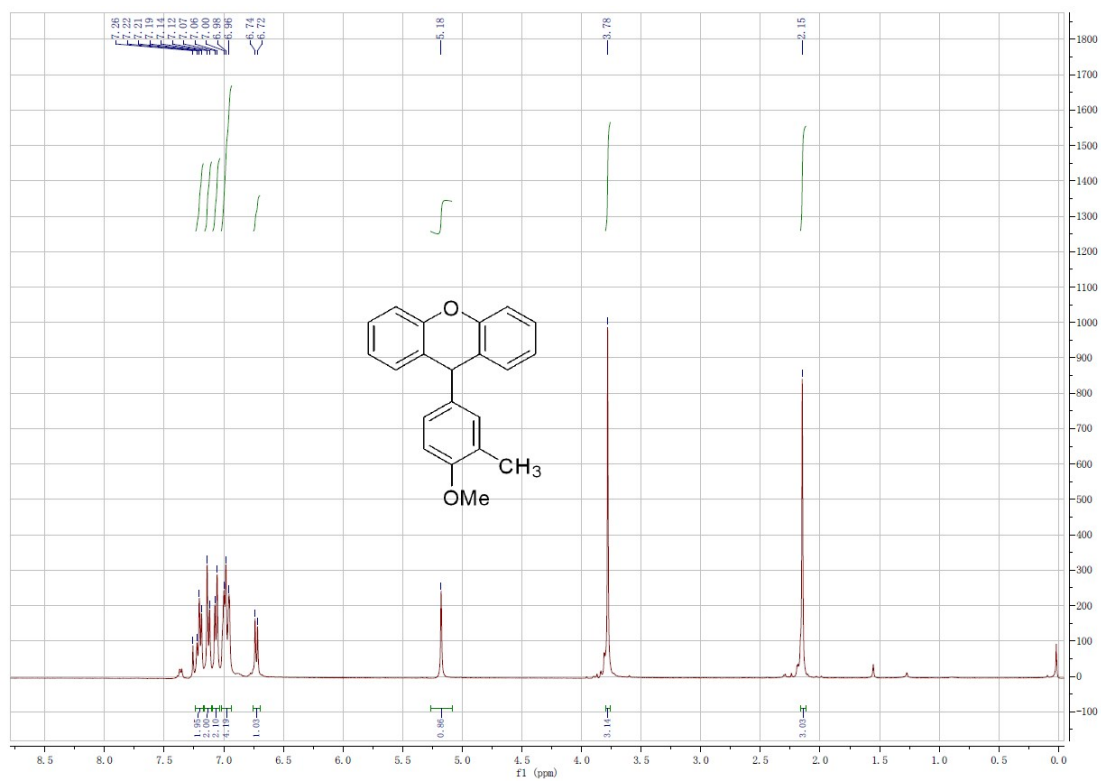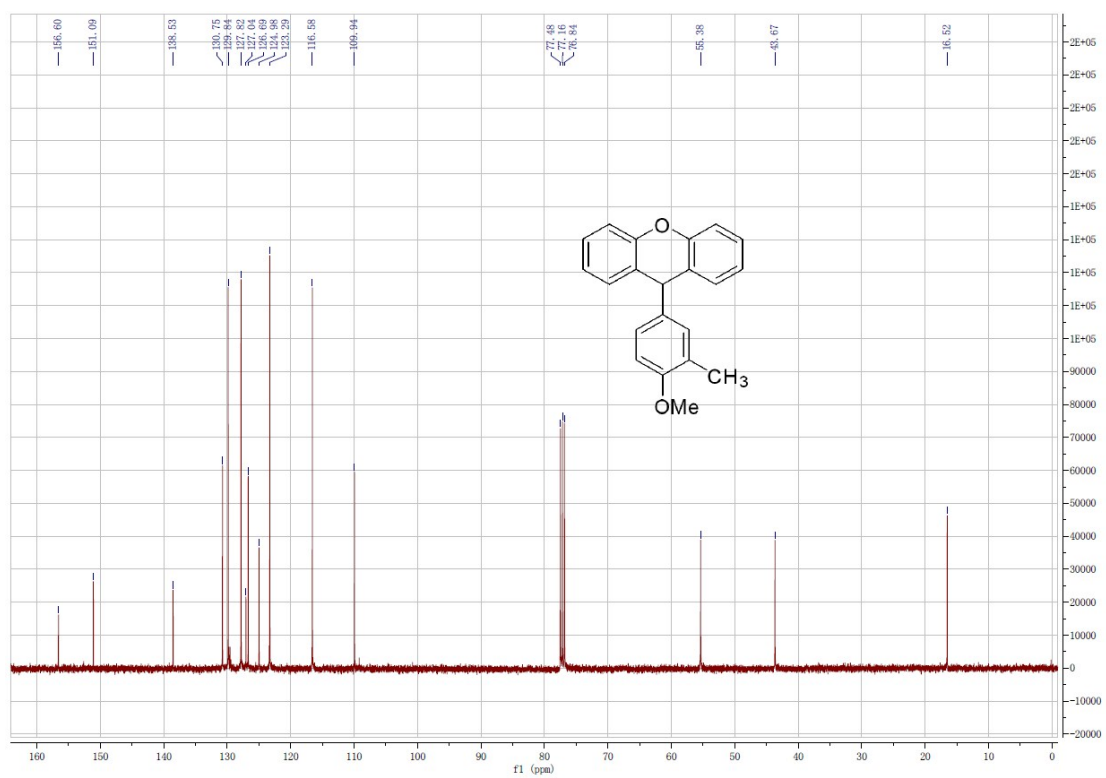

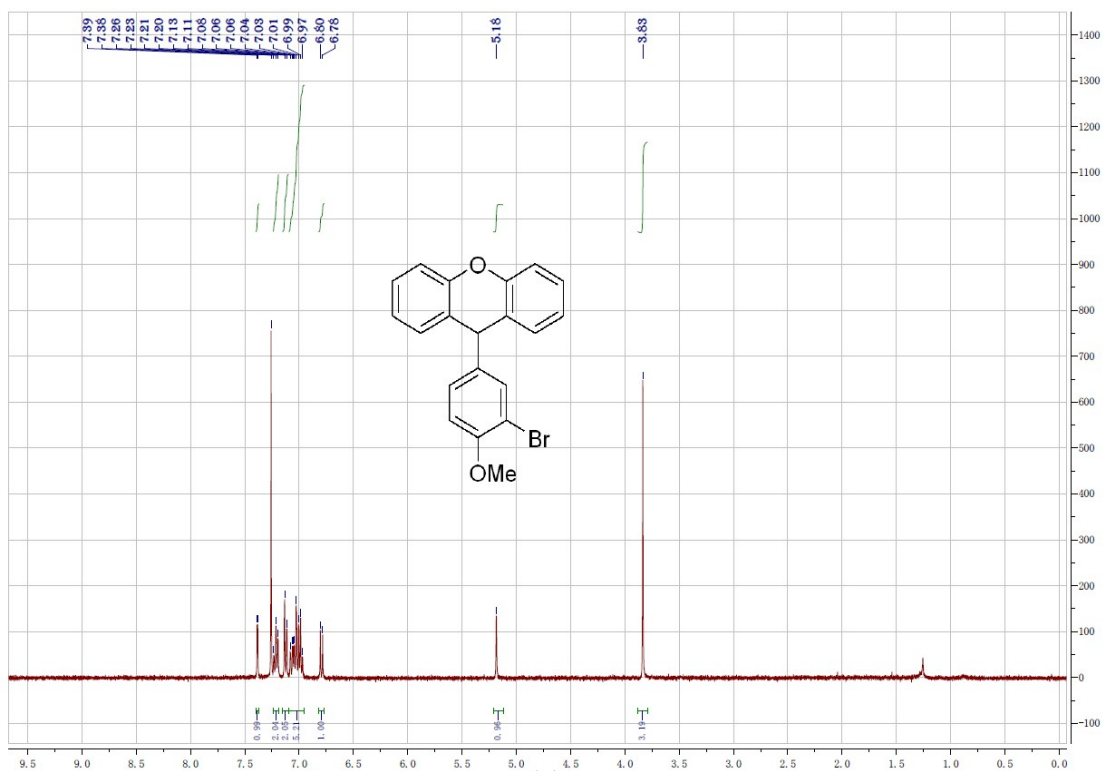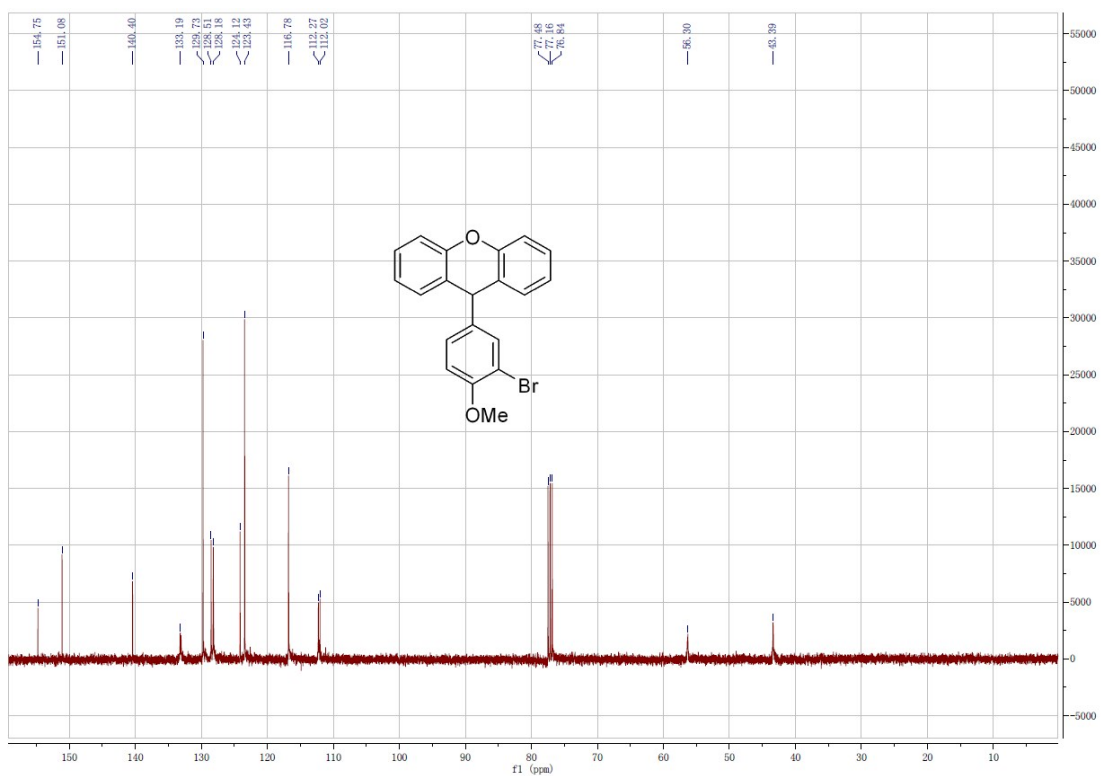

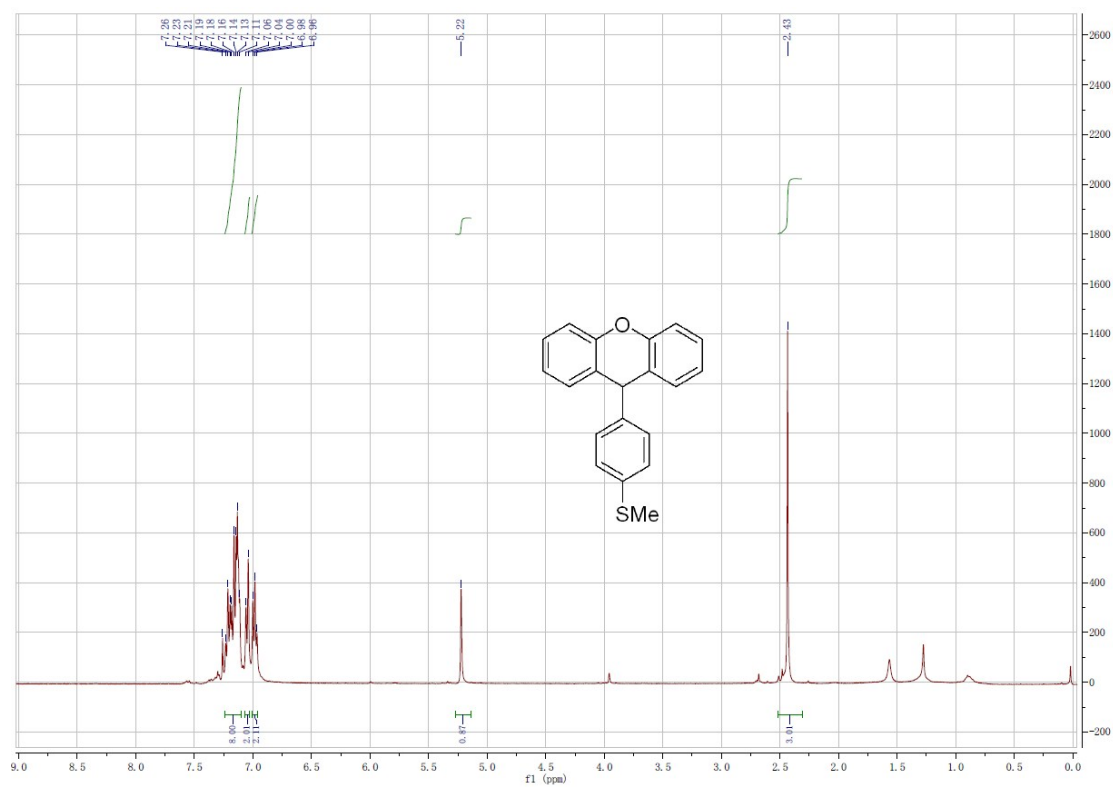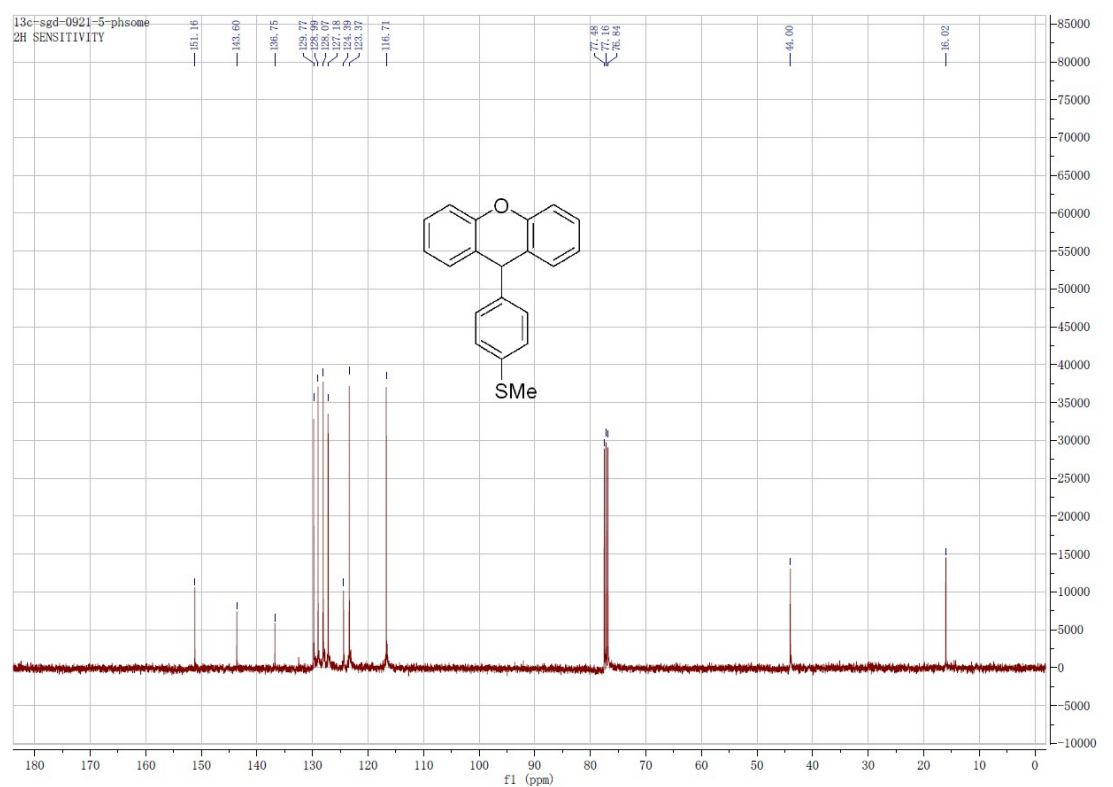



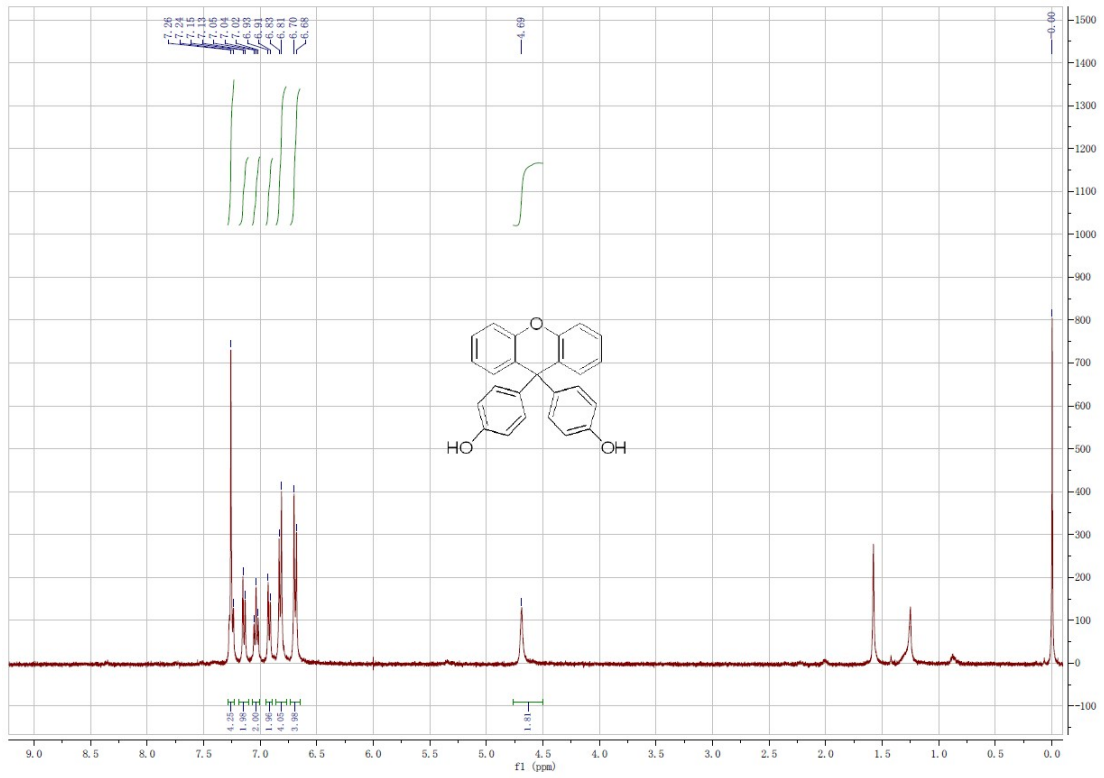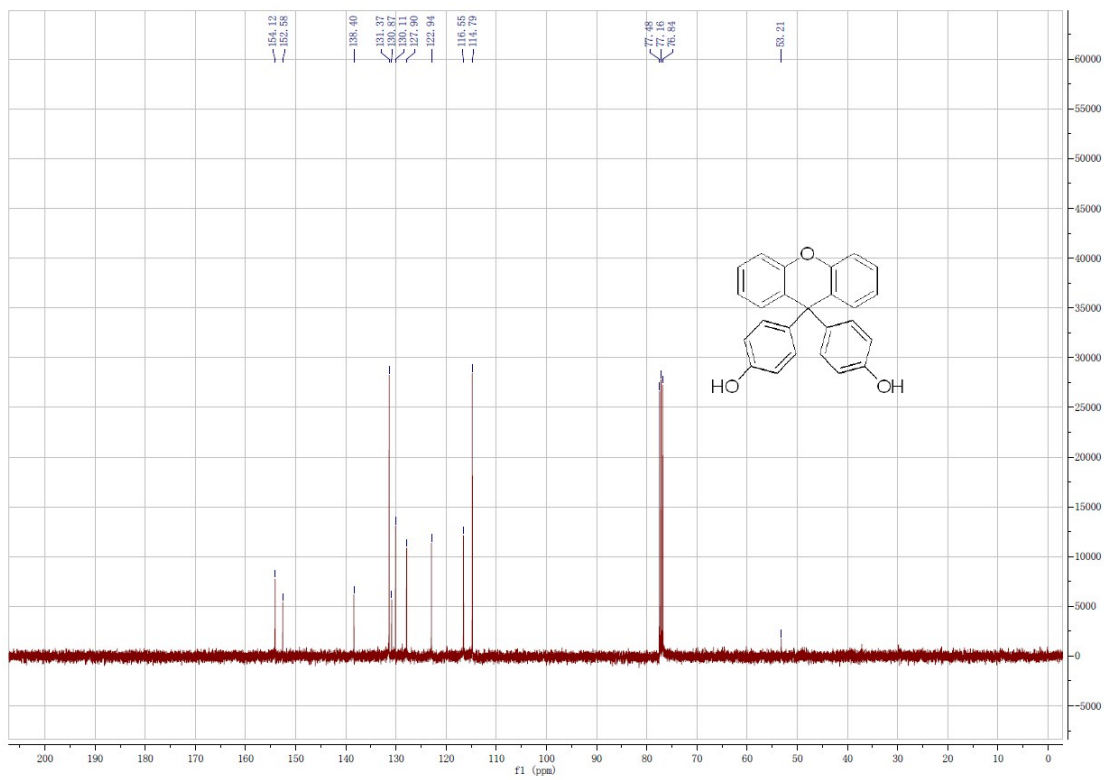

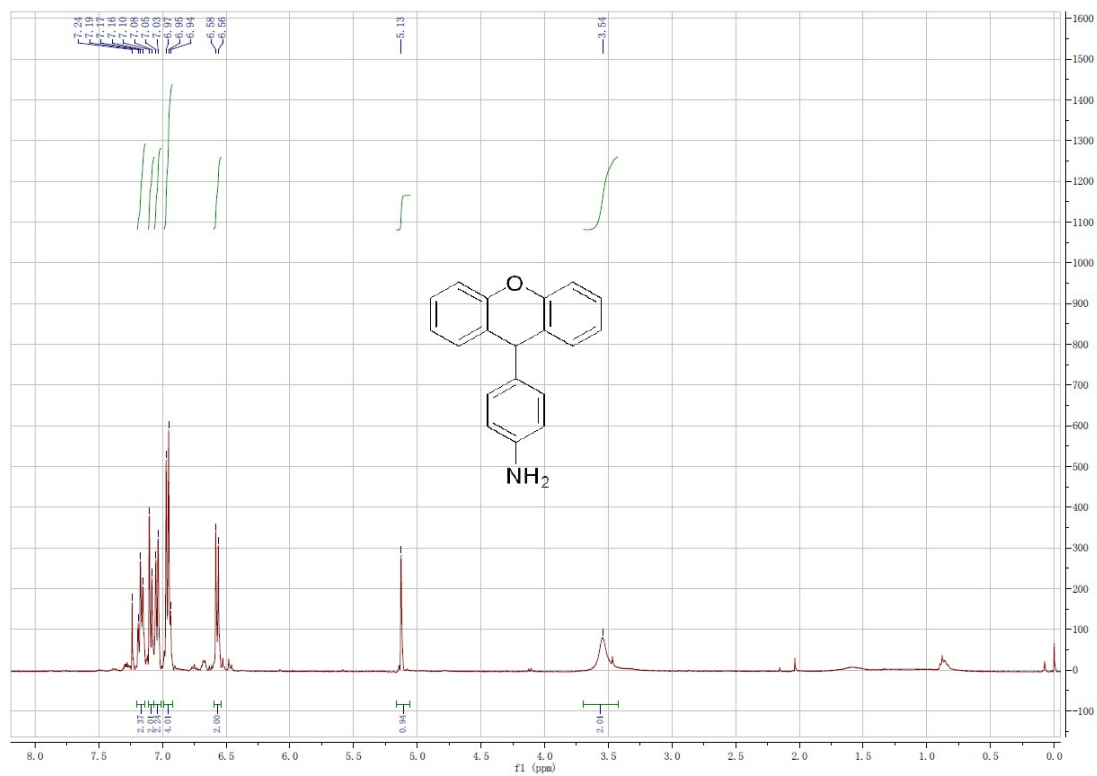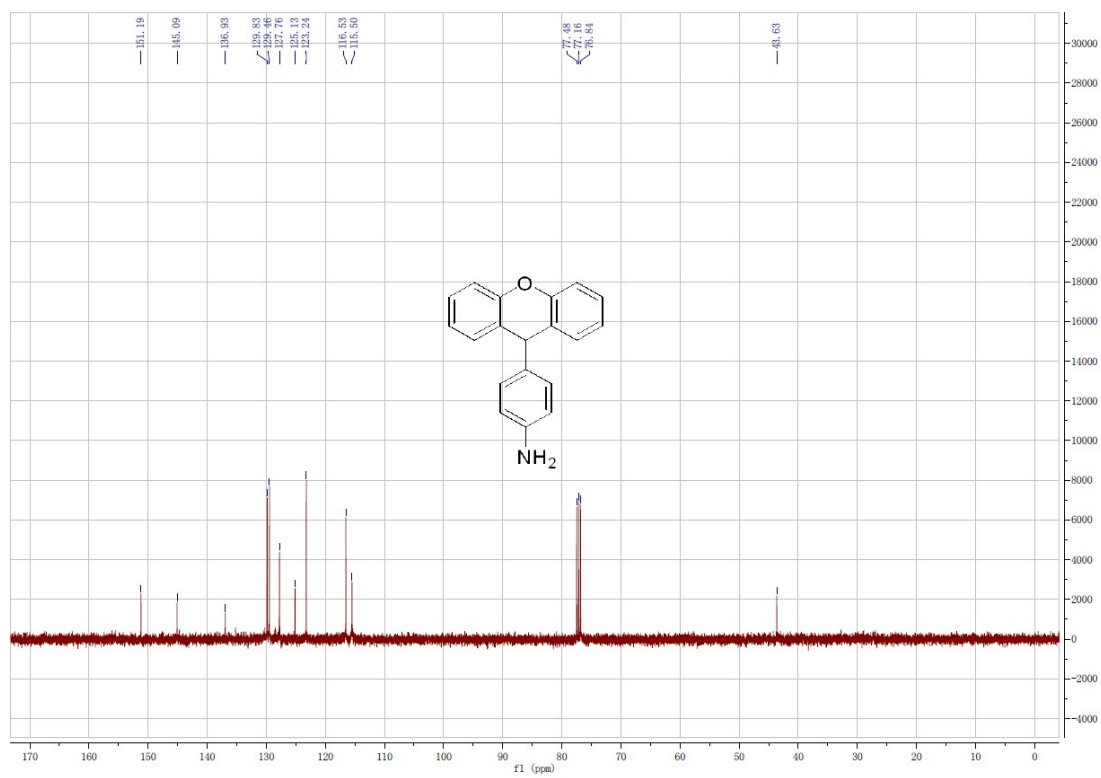

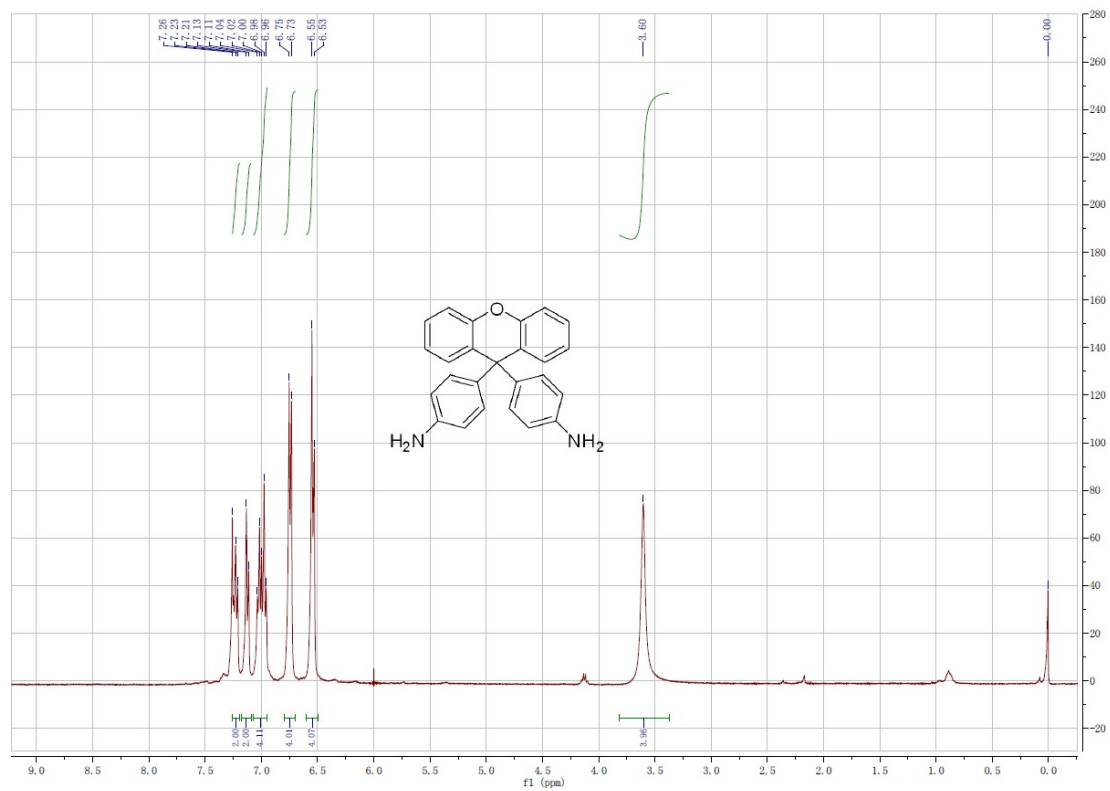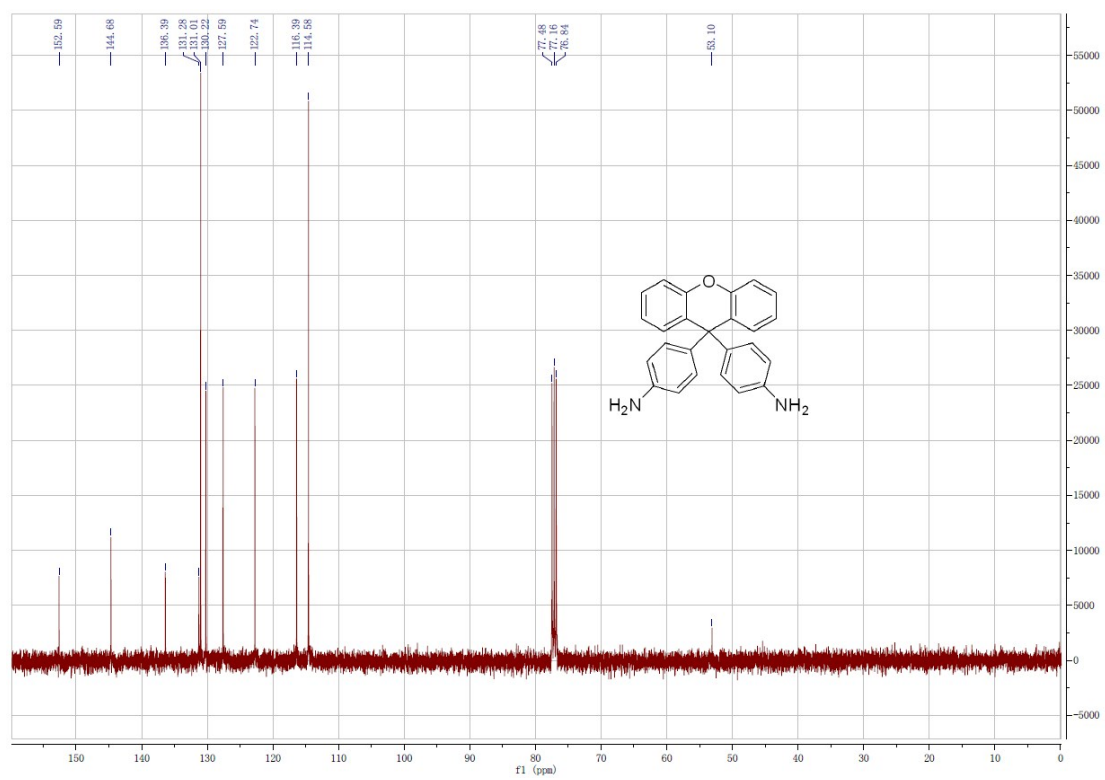

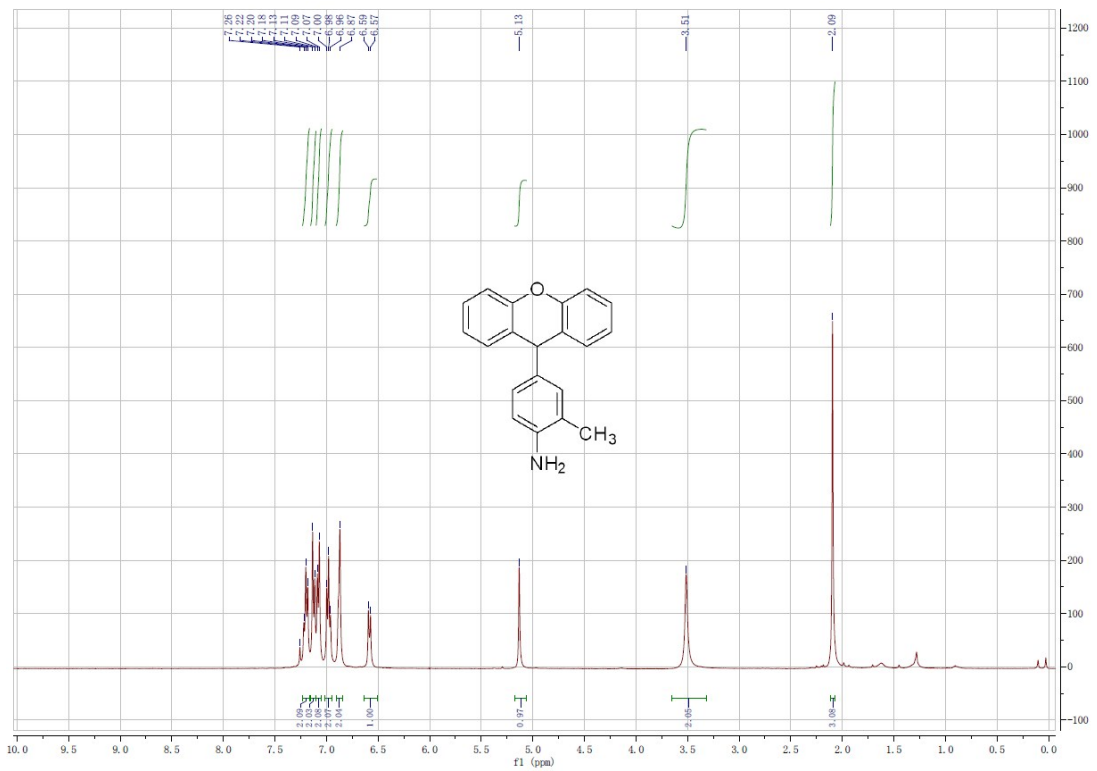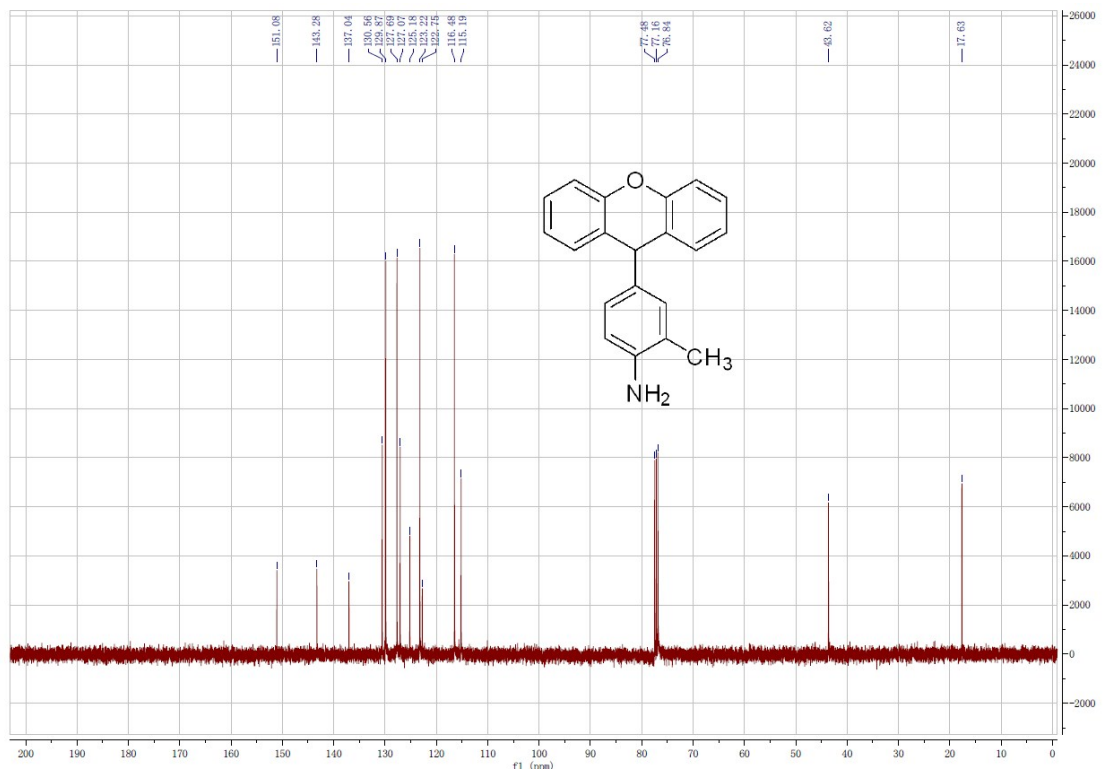

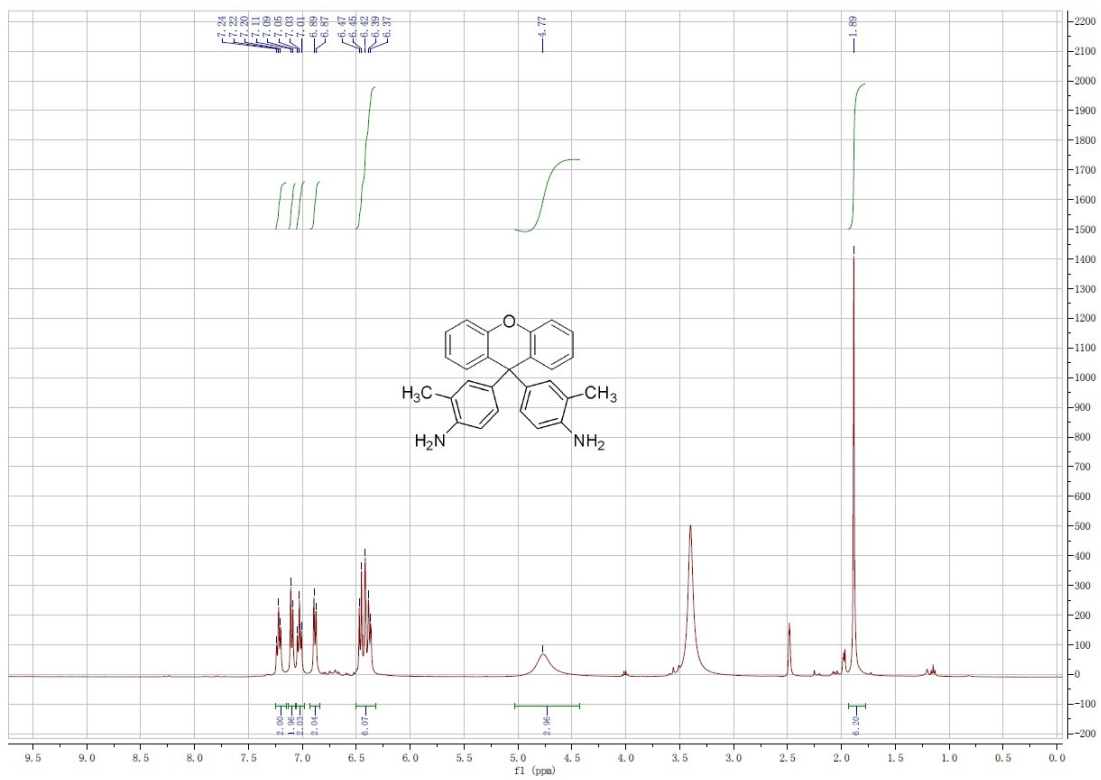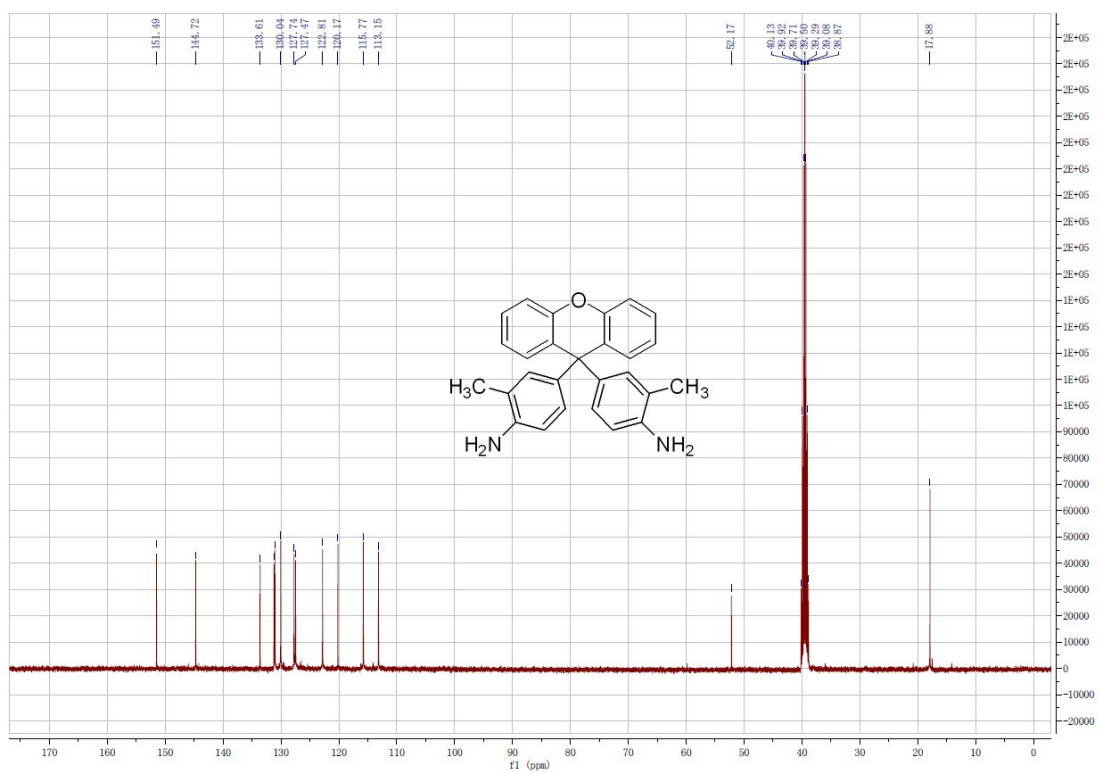

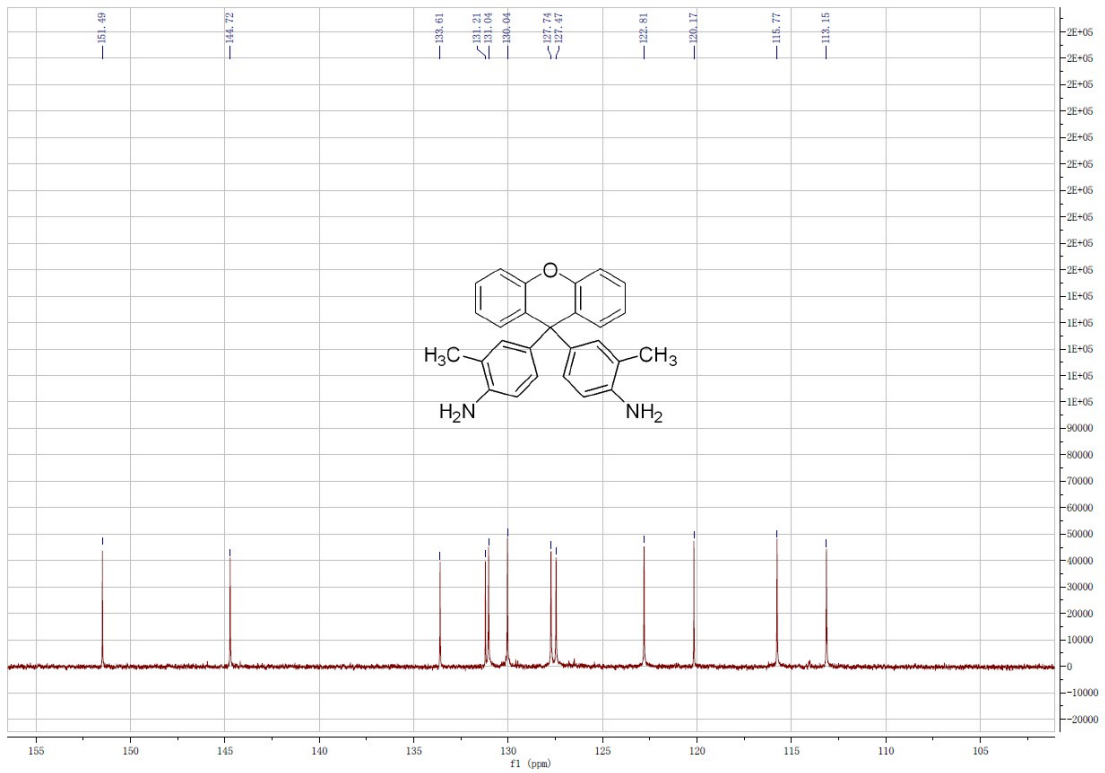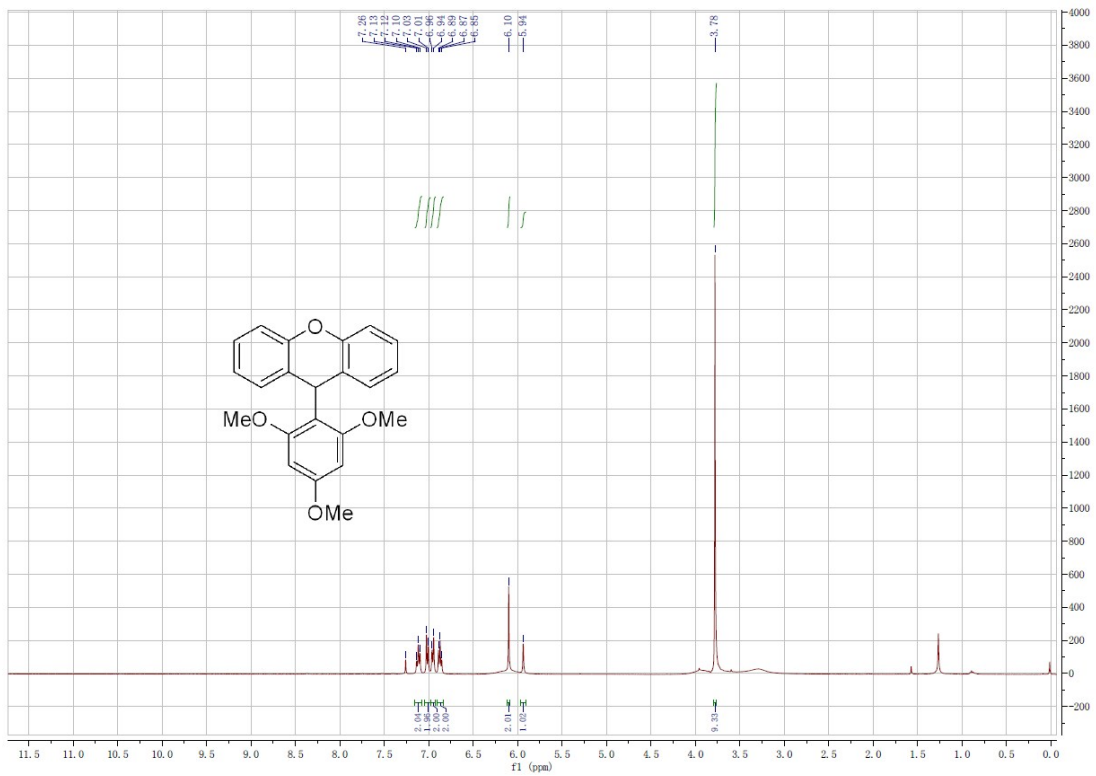

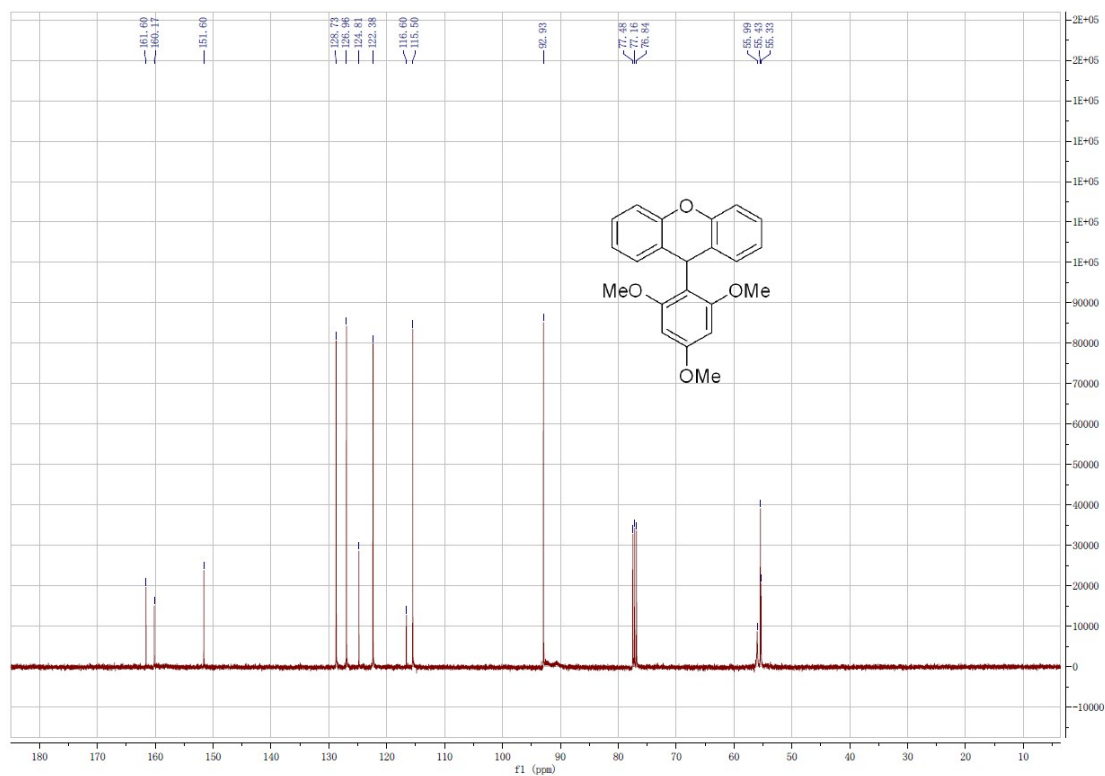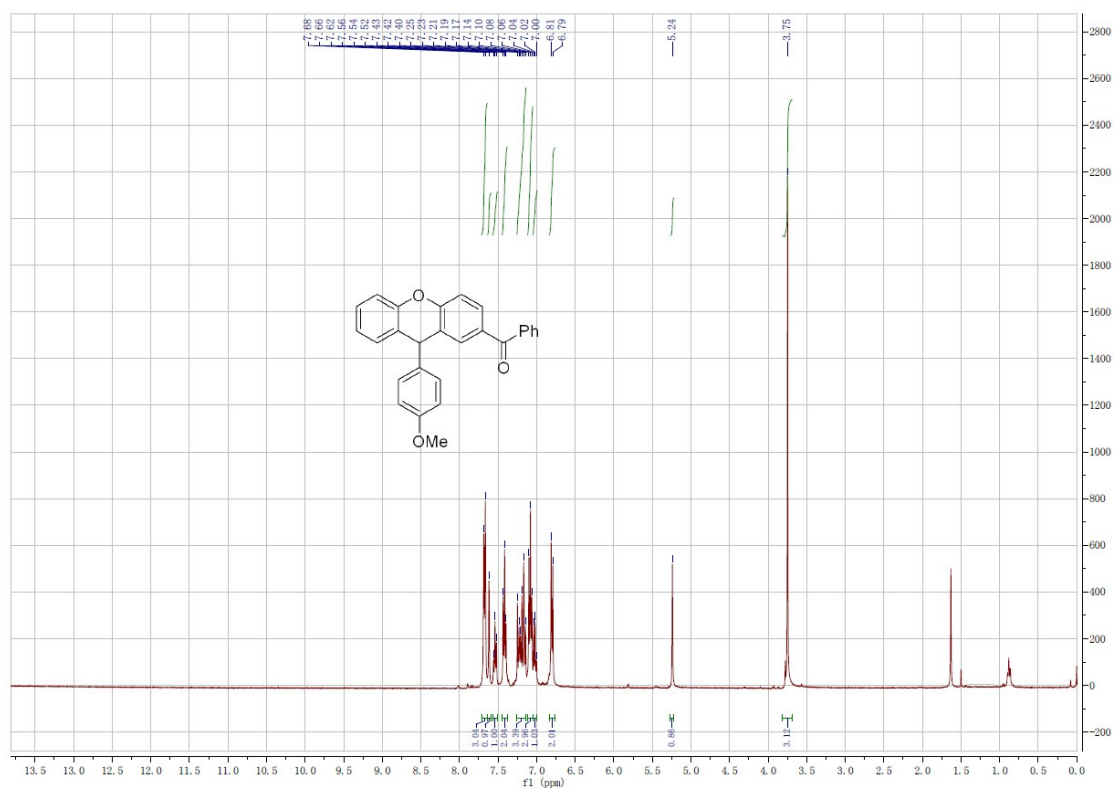

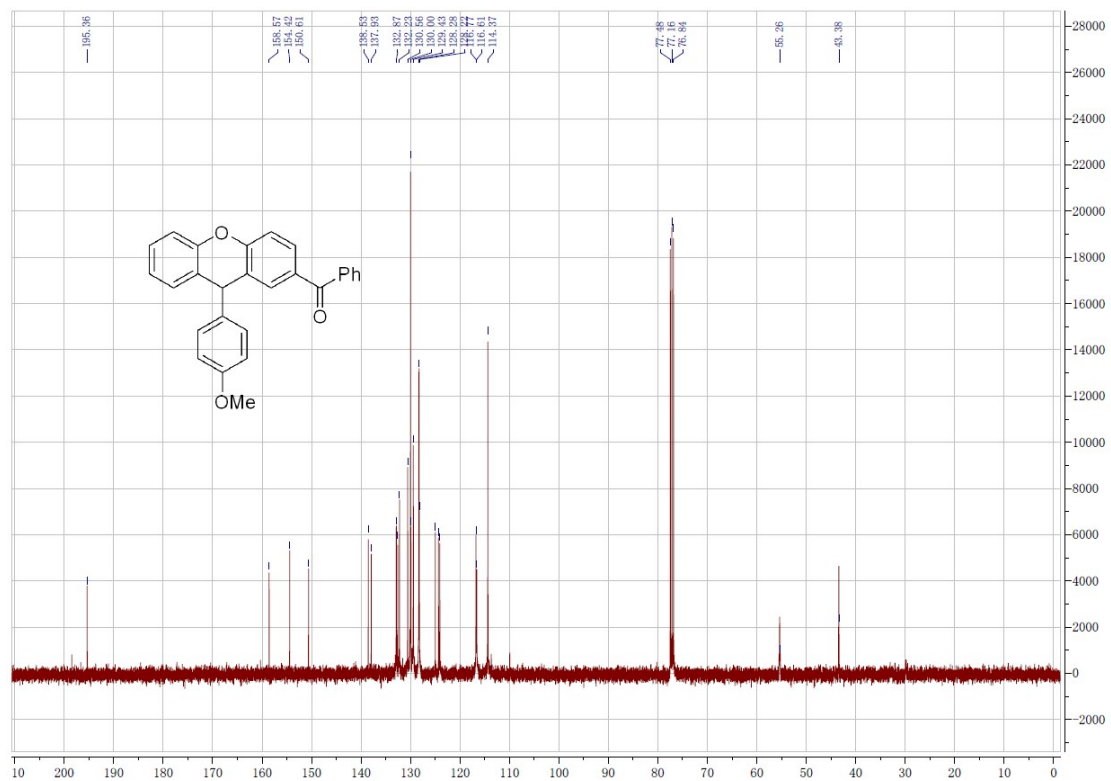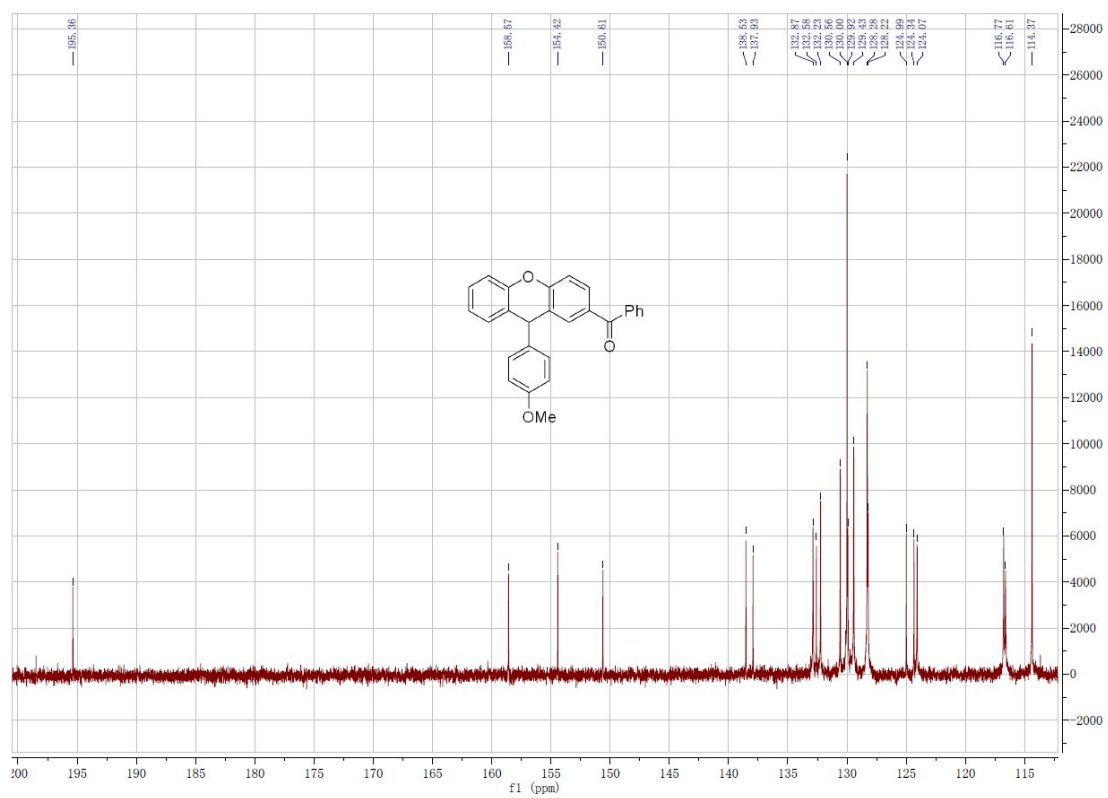





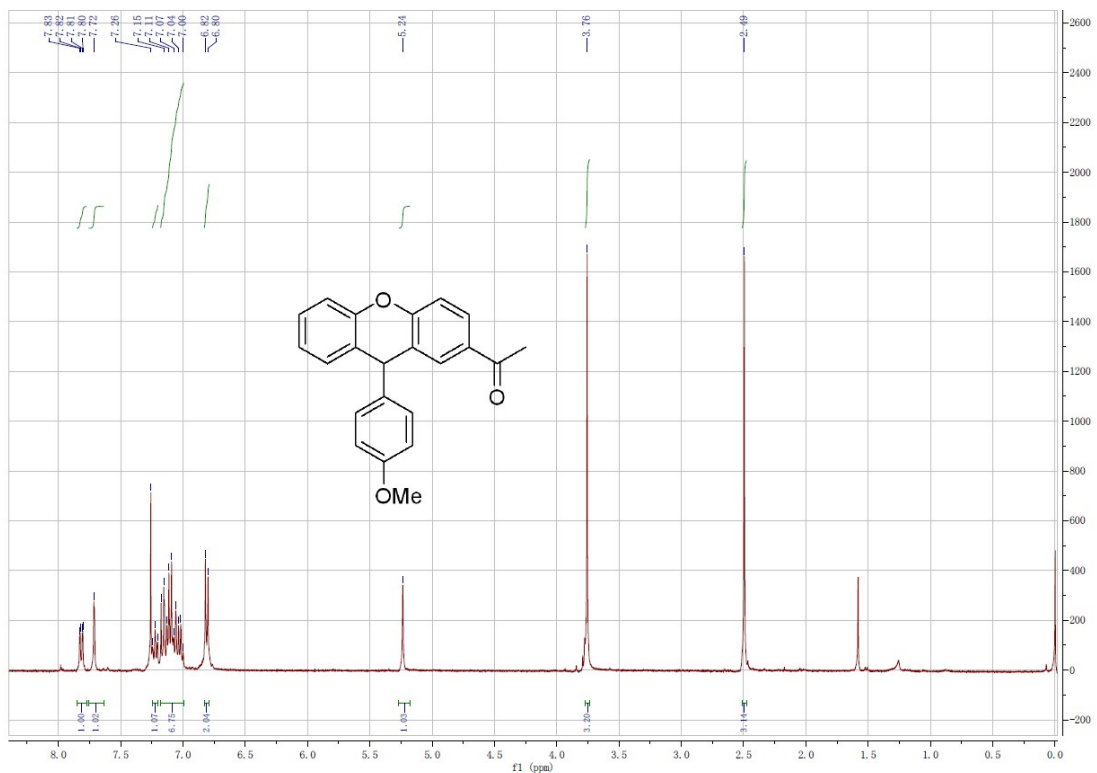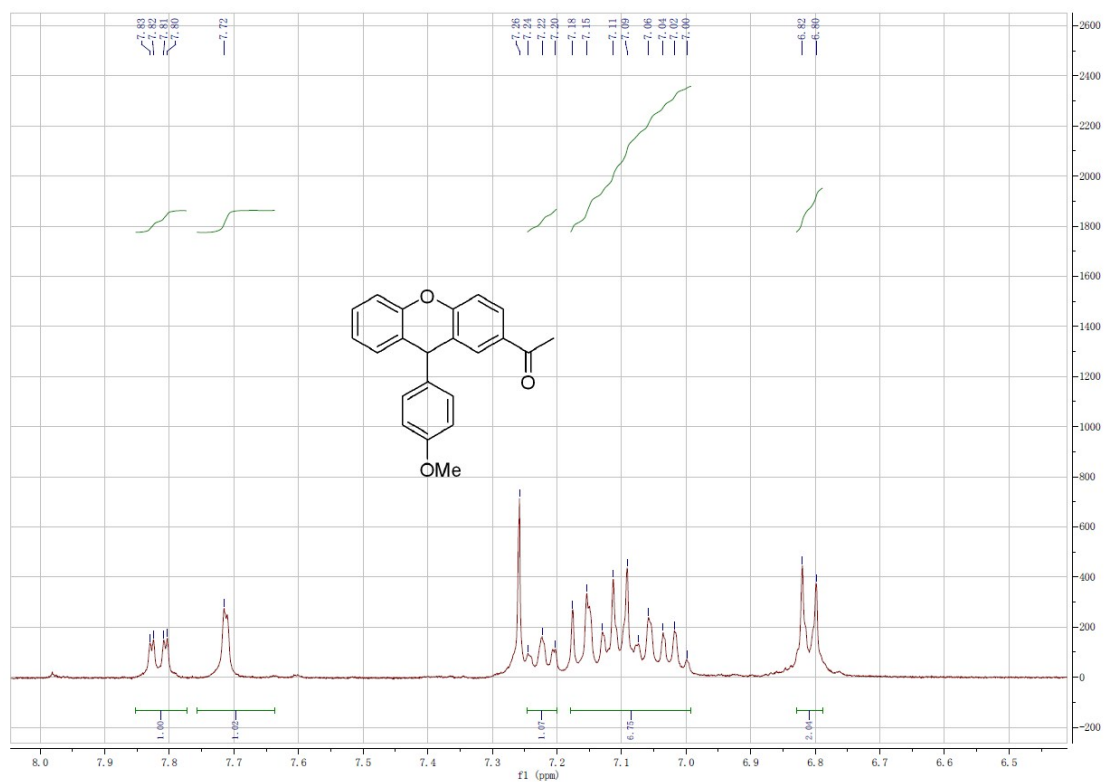

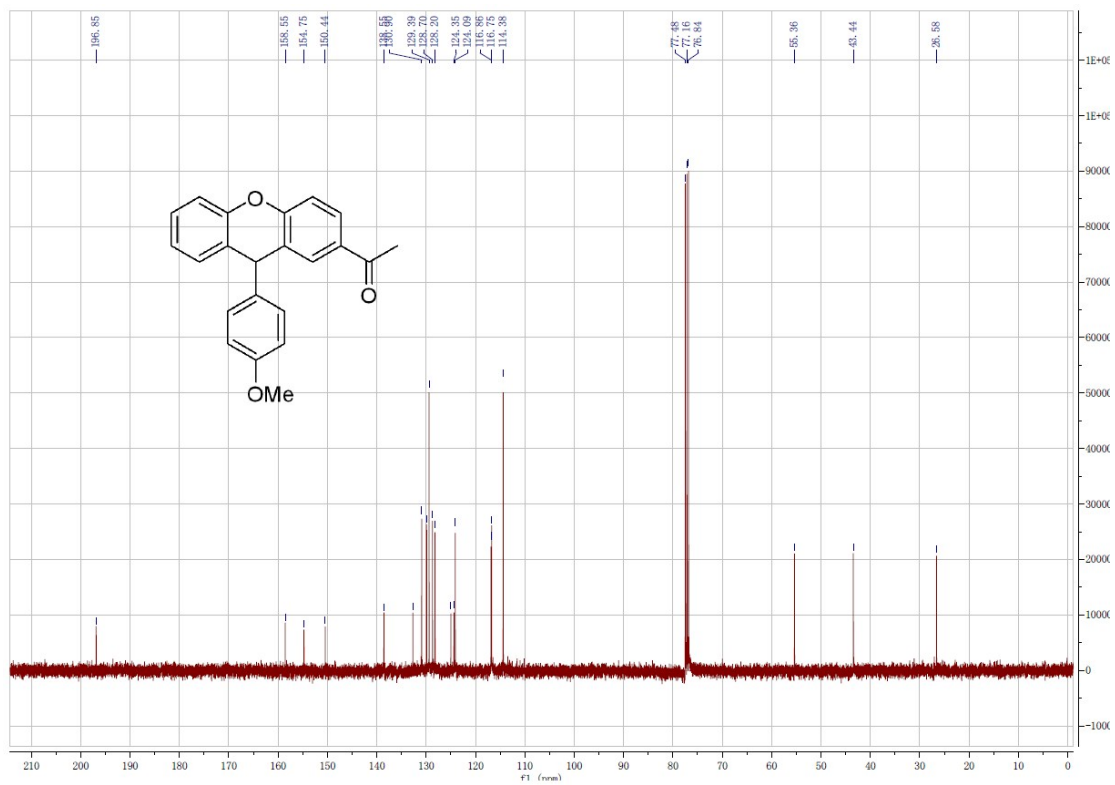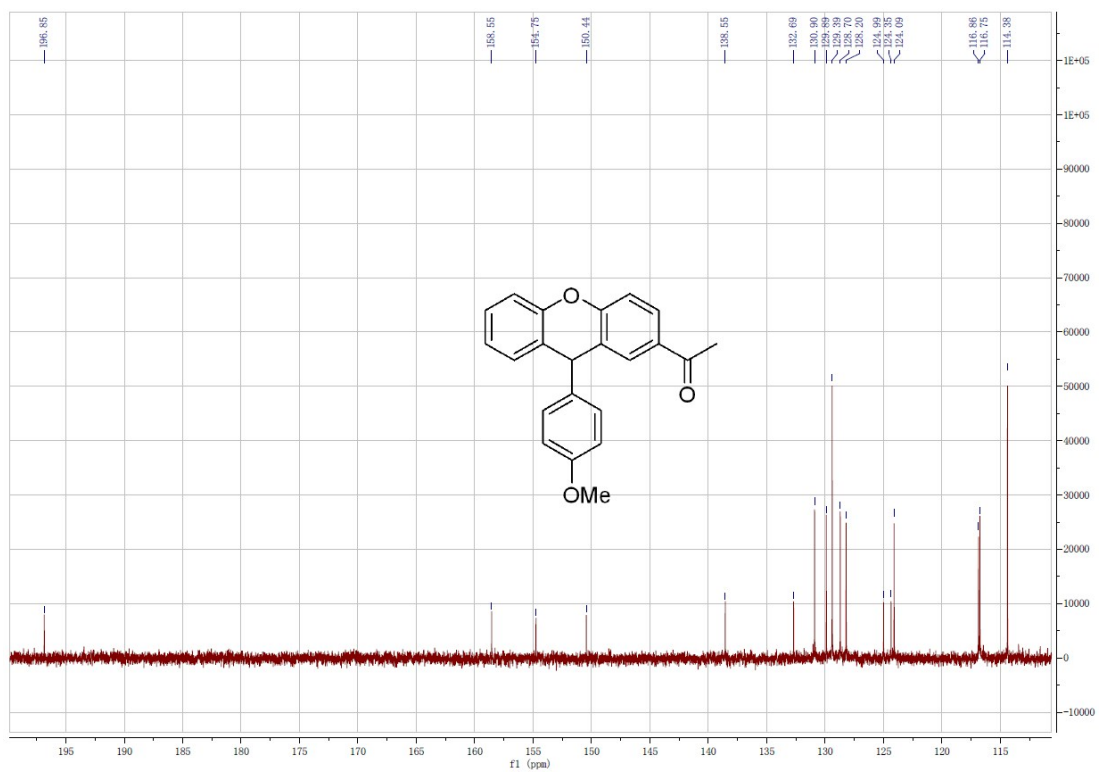

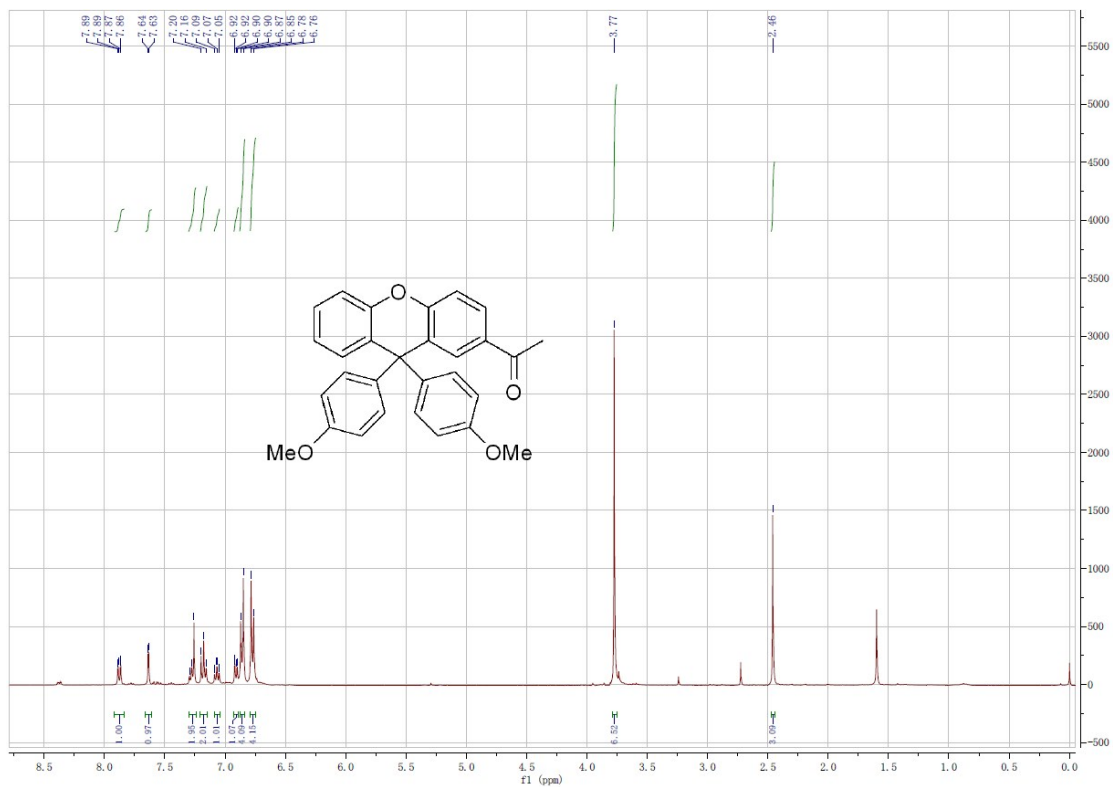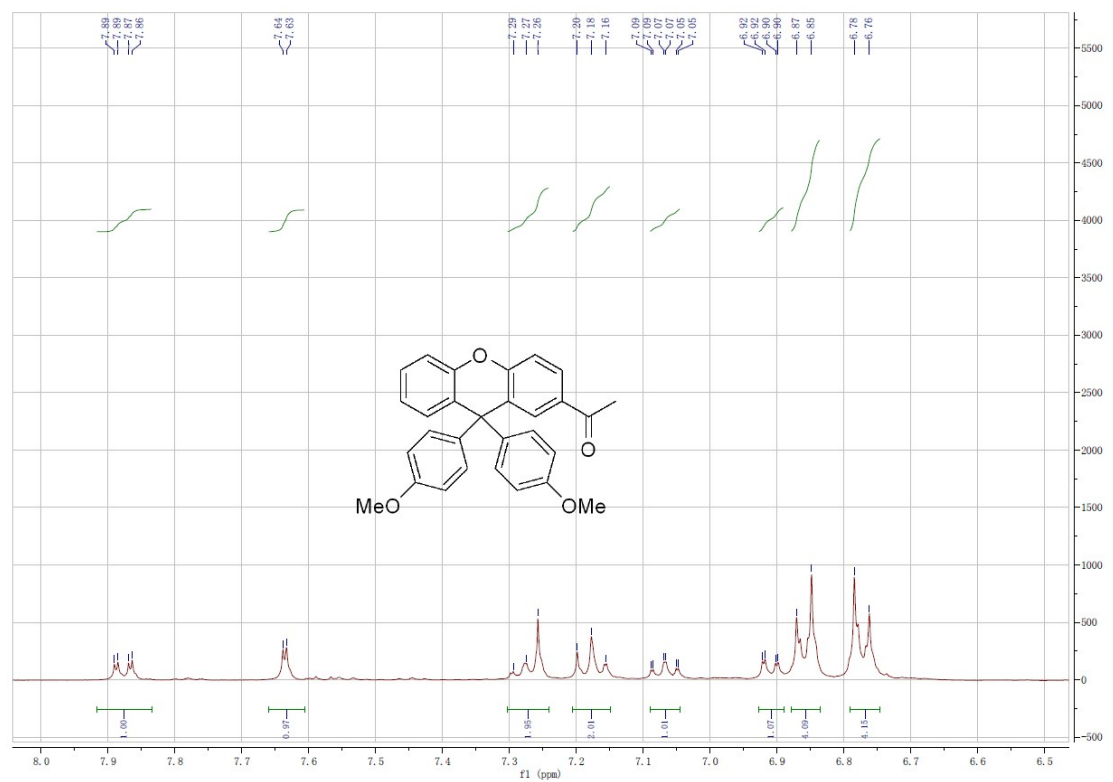

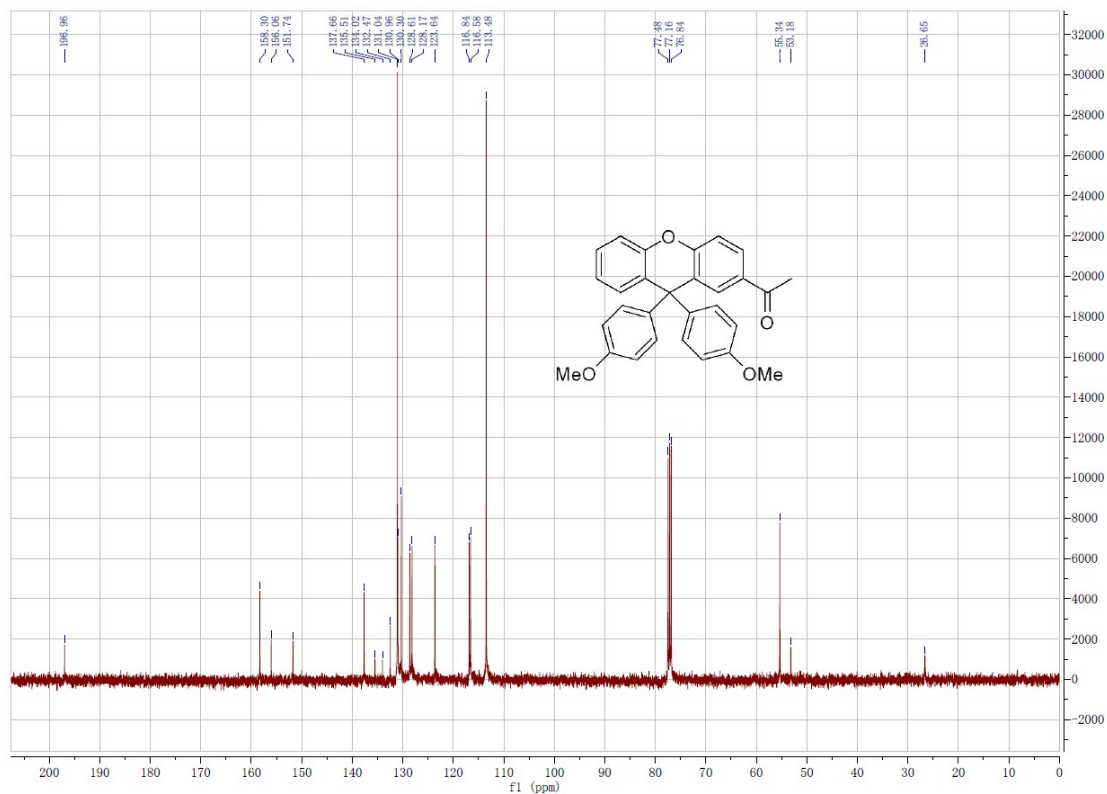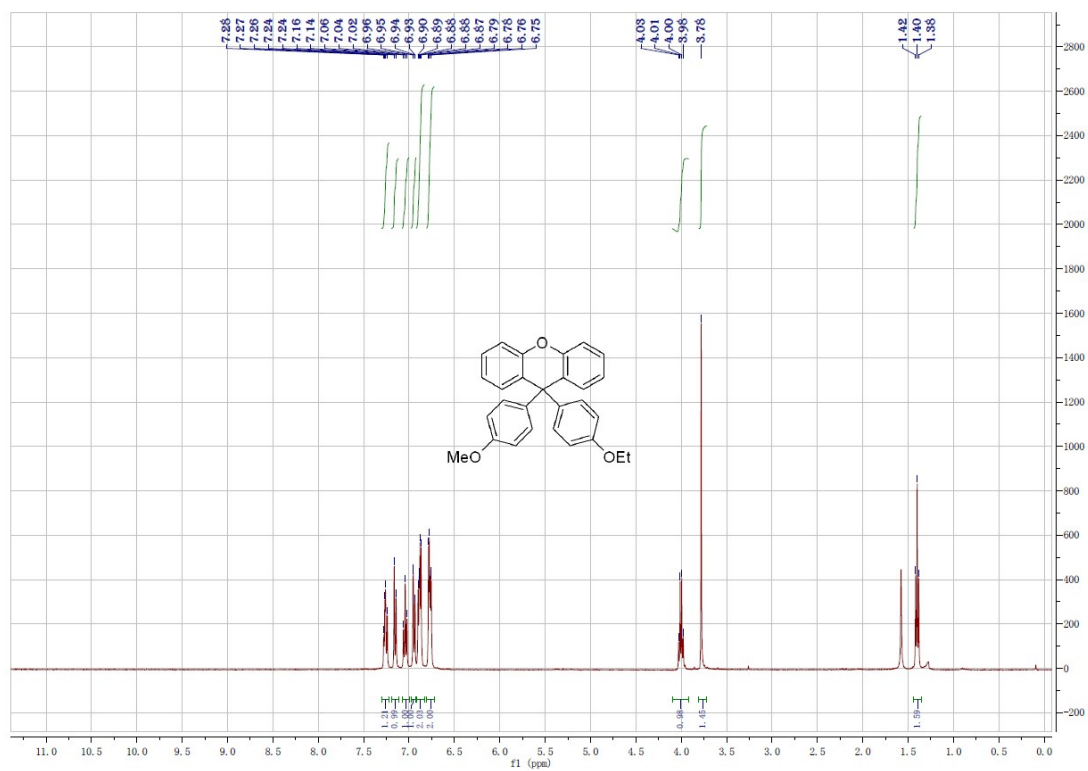

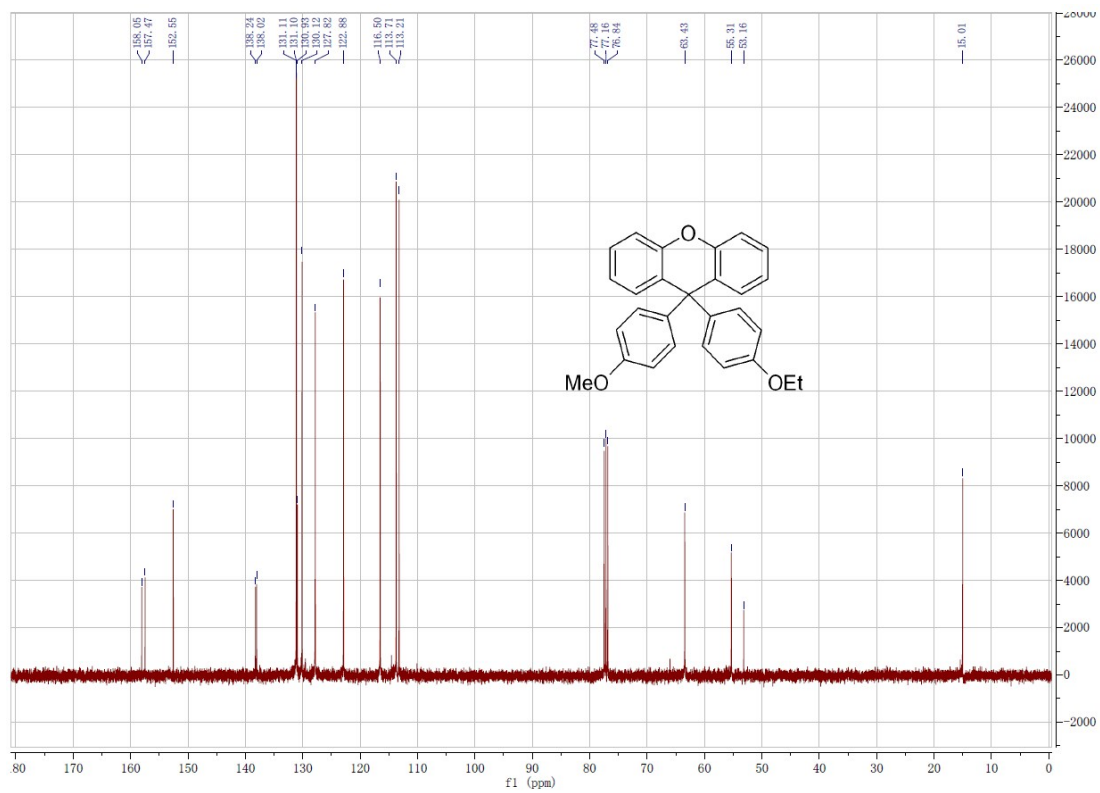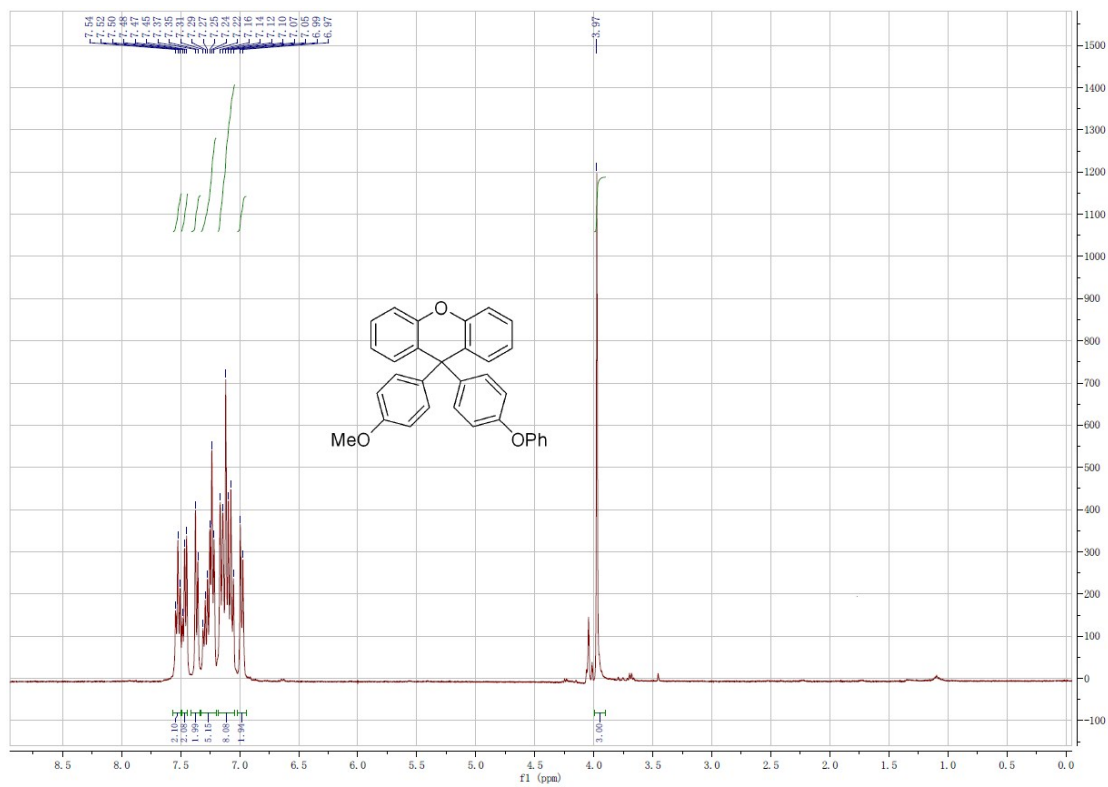

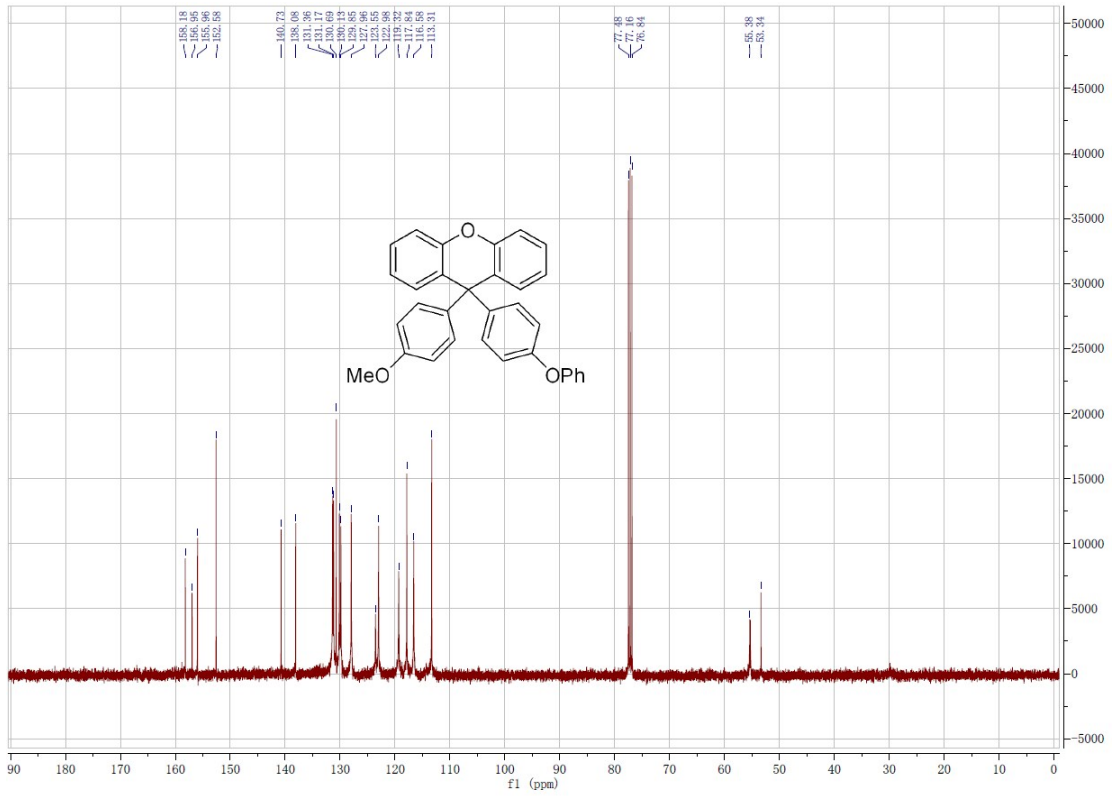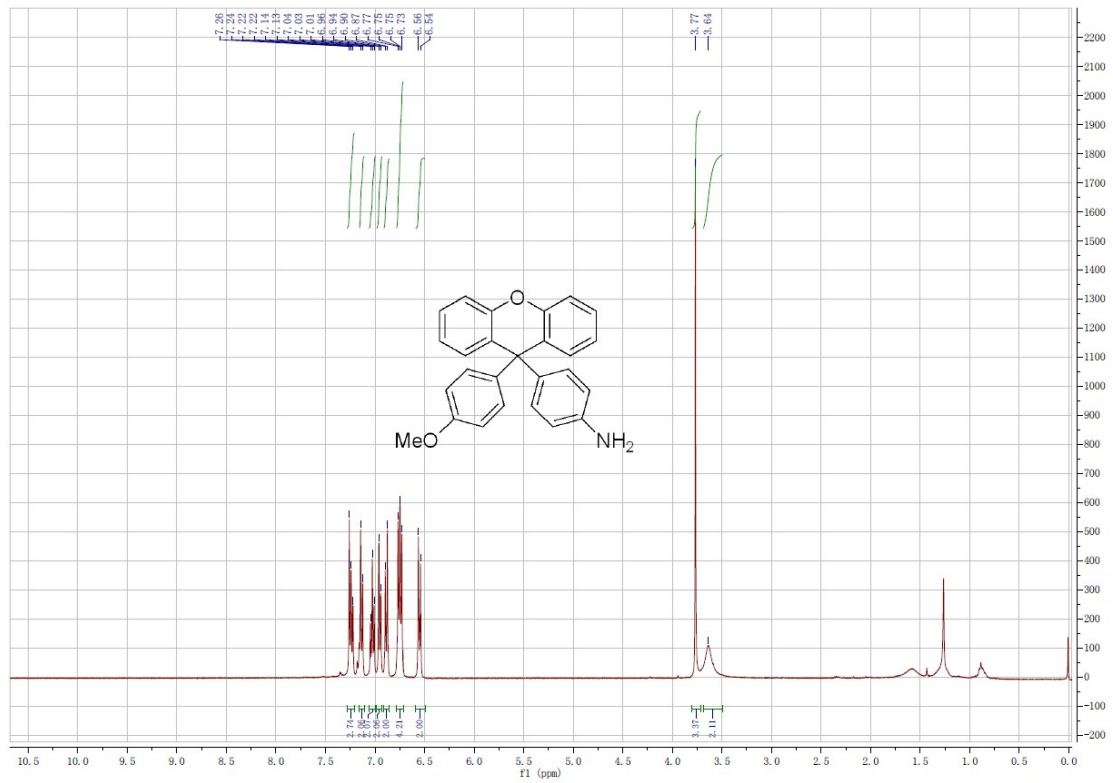

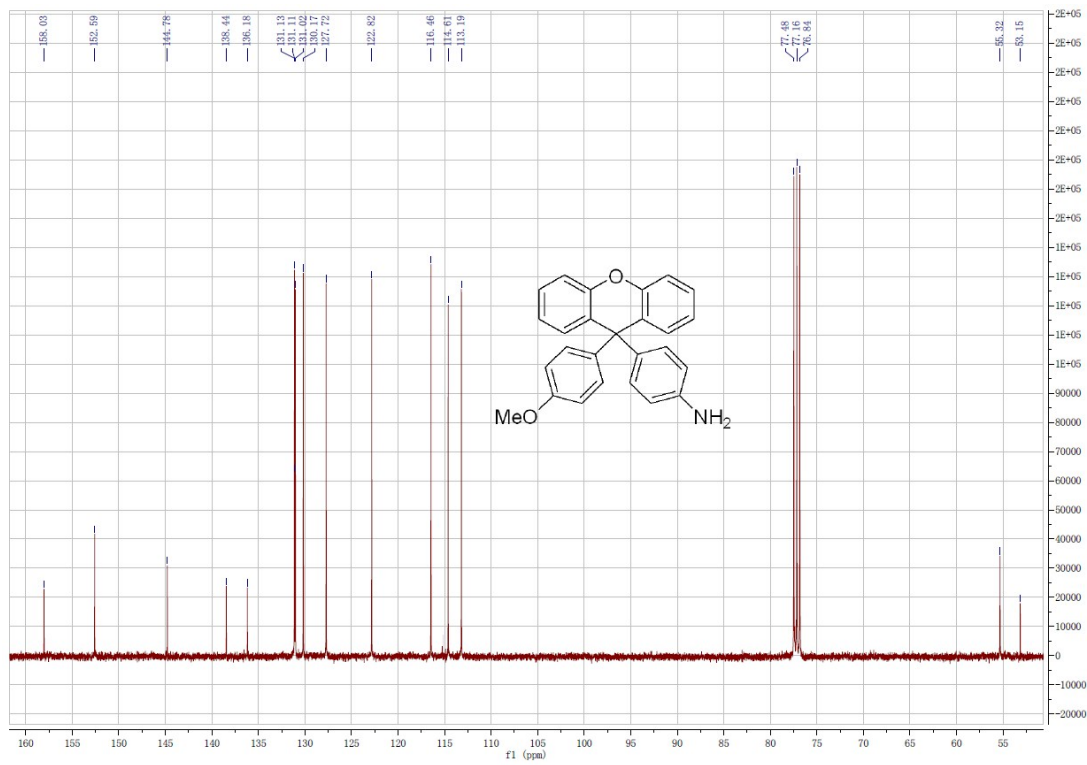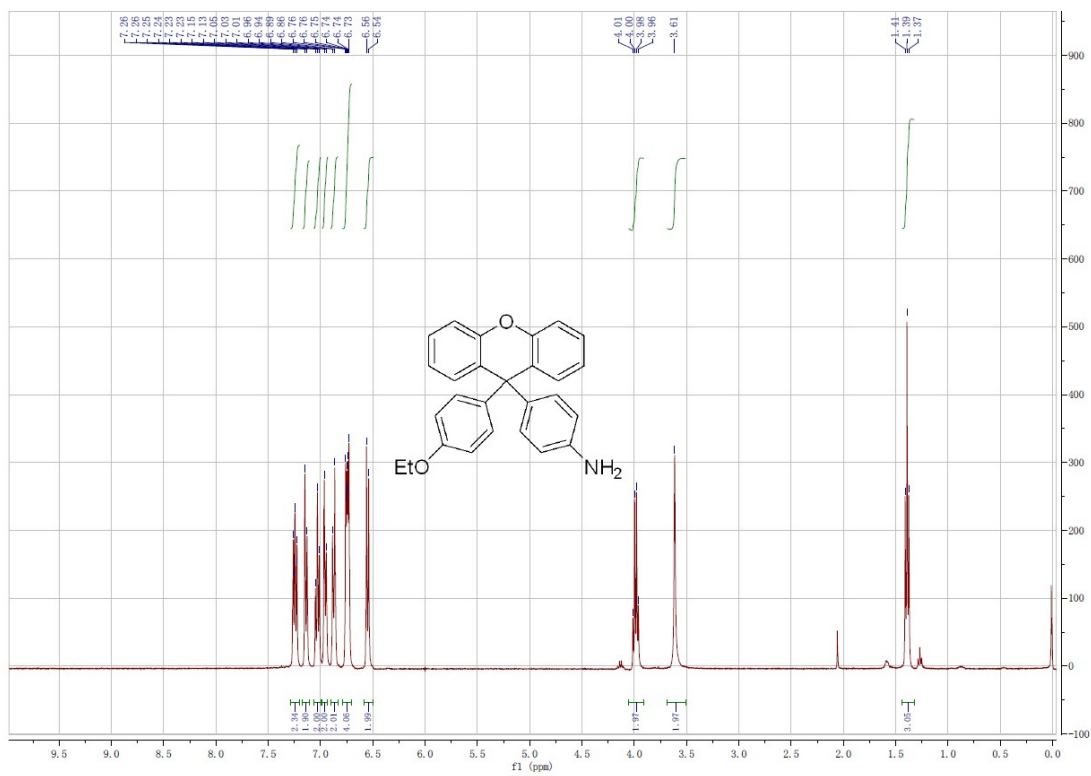



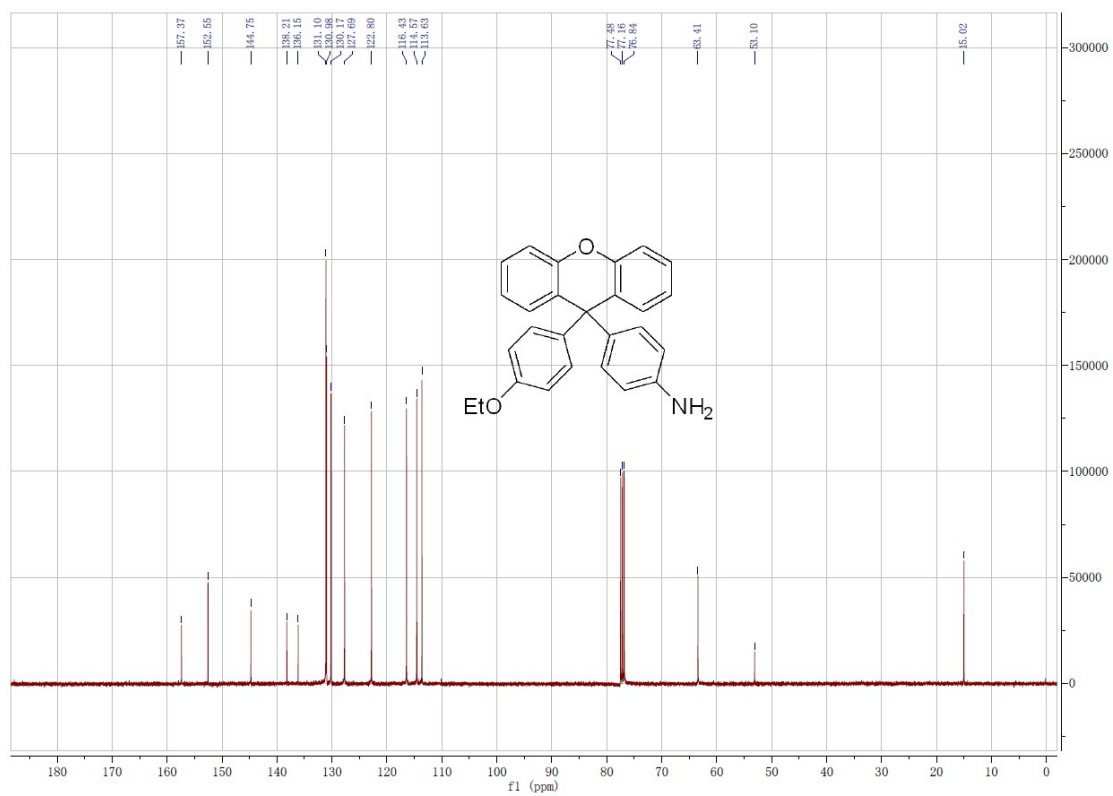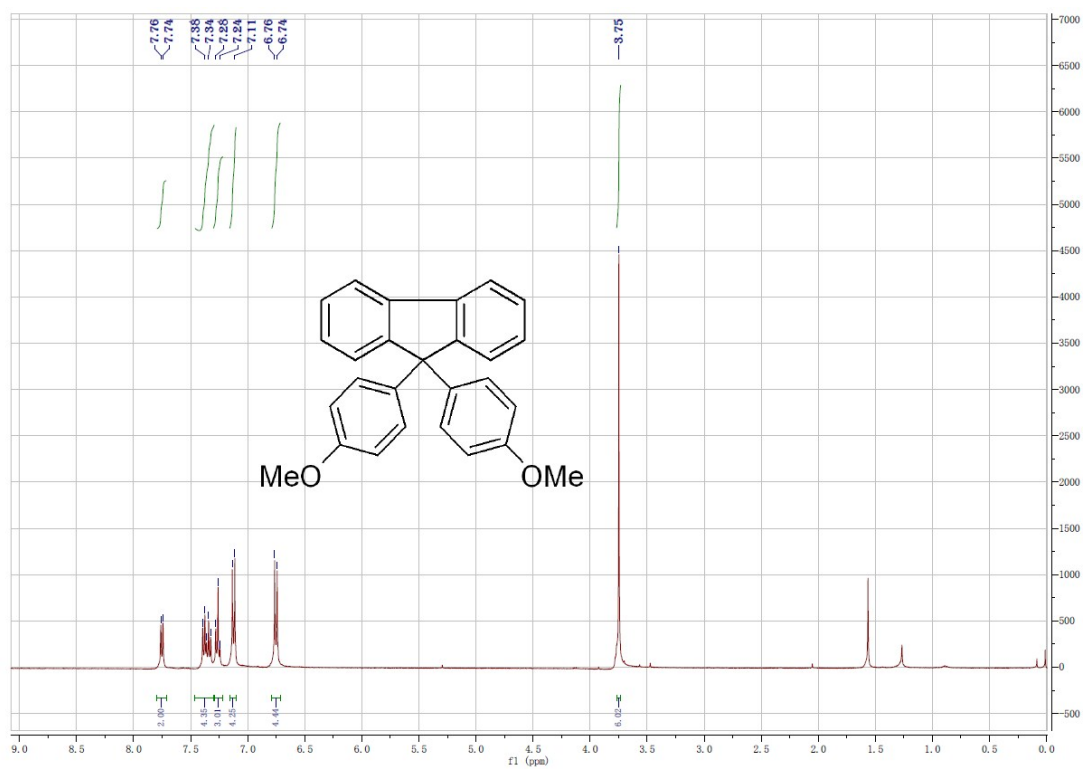

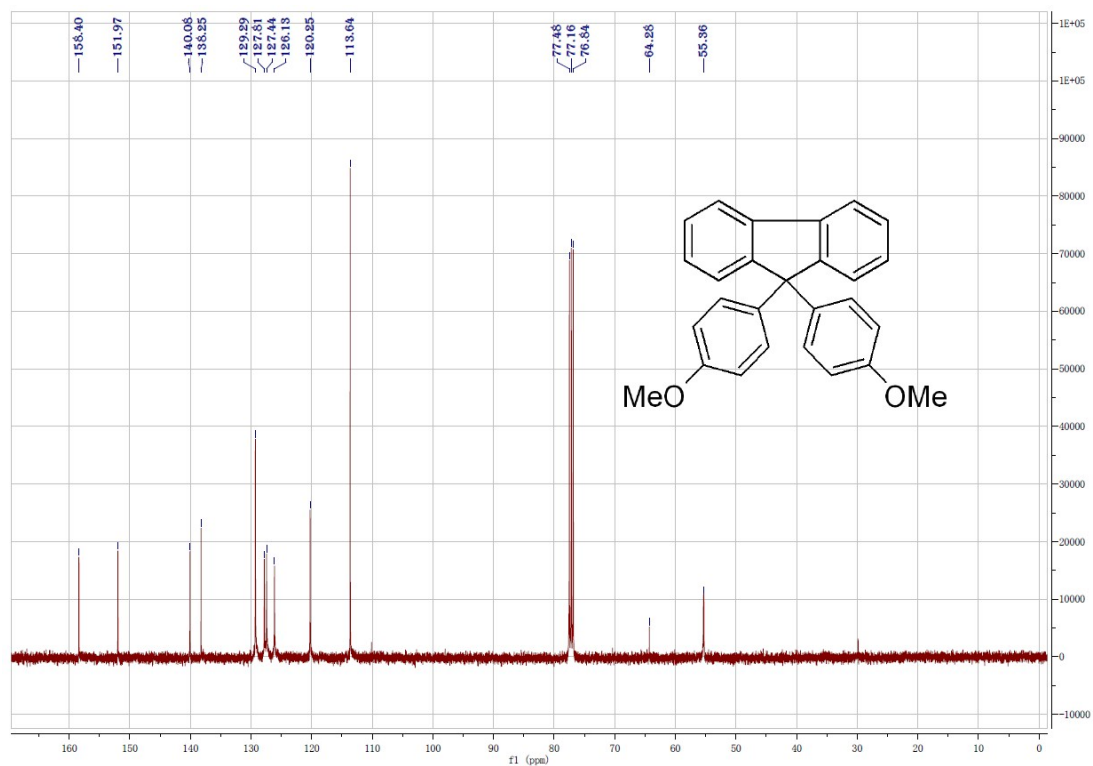

## 6. References

- (1) A. PintEr and M. Klusmann, *Adv. Synth. Catal.* 2012, **354**, 701.
- (2) (a) P. W. Morgan, *Macromolecules*.1970, **3**, 536. (b) S. R. Sheng, T. Li, J. W. Jiang, W. He and C. S. Song, *Polym Int.* 2010, **59**, 1014.
